# Supplementary material for: Calcium Channel Trafficking Blocker Gabapentin Bound to the &alpha;2&delta;-1 Subunit of Voltage-Gated Calcium Channel: A Computational Structural Investigation
Source: Preprints.org preprint supplement (doi:10.20944/preprints202002.0127.v1), 2020-02-10
Supplement: Supplementary file 1 [file supplementary]

## Supporting Material

| PDB ID   | Residue A | Atom A | Residue B  | Atom B | Distance (Å) |
|----------|-----------|--------|------------|--------|--------------|
| RECEPTOR | E.LYS_34  | NZ     | E.ASP_38   | OD1    | 3.965        |
| RECEPTOR | E.LYS_34  | NZ     | E.GLU_994  | OE2    | 2.627        |
| RECEPTOR | E.LYS_63  | NZ     | E.GLU_702  | OE1    | 3.846        |
| RECEPTOR | E.LYS_63  | NZ     | E.GLU_702  | OE2    | 2.550        |
| RECEPTOR | E.ARG_76  | NH1    | E.GLU_566  | OE2    | 3.557        |
| RECEPTOR | E.ARG_84  | NH2    | E.GLU_80   | OE1    | 3.550        |
| RECEPTOR | E.ARG_93  | NH1    | E.ASP_200  | OD1    | 3.975        |
| RECEPTOR | E.ARG_93  | NH1    | E.ASP_200  | OD2    | 2.627        |
| RECEPTOR | E.ARG_99  | NH1    | E.GLU_199  | OE1    | 2.817        |
| RECEPTOR | E.ARG_99  | NH2    | E.GLU_199  | OE1    | 2.746        |
| RECEPTOR | E.ARG_99  | NH2    | E.GLU_199  | OE2    | 3.605        |
| RECEPTOR | E.LYS_106 | NZ     | E.GLU_103  | OE1    | 2.608        |
| RECEPTOR | E.LYS_106 | NZ     | E.GLU_103  | OE2    | 3.120        |
| RECEPTOR | E.ARG_135 | NH1    | E.GLU_137  | OE2    | 2.673        |
| RECEPTOR | E.ARG_144 | NH2    | E.GLU_174  | OE2    | 2.779        |
| RECEPTOR | E.HIS_167 | NE2    | E.ASP_234  | OD2    | 2.815        |
| RECEPTOR | E.ARG_195 | NH1    | E.GLU_191  | OE2    | 2.535        |
| RECEPTOR | E.ARG_216 | NH2    | E.ASP_190  | OD1    | 2.669        |
| RECEPTOR | E.ARG_216 | NH2    | E.ASP_190  | OD2    | 2.973        |
| RECEPTOR | E.ARG_239 | NH1    | E.ASP_237  | OD1    | 3.770        |
| RECEPTOR | E.ARG_239 | NH1    | E.ASP_237  | OD2    | 2.868        |
| RECEPTOR | E.ARG_240 | NH2    | E.GLU_278  | OE1    | 3.059        |
| RECEPTOR | E.LYS_252 | NZ     | E.ASP_287  | OD1    | 2.794        |
| RECEPTOR | E.LYS_252 | NZ     | E.ASP_287  | OD2    | 2.839        |
| RECEPTOR | E.LYS_319 | NZ     | E.GLU_281  | OE1    | 2.641        |
| RECEPTOR | E.LYS_319 | NZ     | E.GLU_281  | OE2    | 2.517        |
| RECEPTOR | E.ARG_351 | NH2    | E.ASP_253  | OD2    | 3.843        |
| RECEPTOR | E.LYS_380 | NZ     | E.GLU_405  | OE1    | 3.295        |
| RECEPTOR | E.LYS_380 | NZ     | E.GLU_405  | OE2    | 3.397        |
| RECEPTOR | E.LYS_381 | NZ     | E.ASP_379  | OD2    | 2.559        |
| RECEPTOR | E.ARG_383 | NH1    | E.GLU_1054 | OE1    | 2.888        |
| RECEPTOR | E.ARG_383 | NH1    | E.GLU_1054 | OE2    | 3.925        |
| RECEPTOR | E.ARG_383 | NH2    | E.GLU_1054 | OE1    | 2.686        |
| RECEPTOR | E.ARG_383 | NH2    | E.GLU_1054 | OE2    | 2.723        |
| RECEPTOR | E.ARG_396 | NH1    | E.GLU_412  | OE1    | 2.752        |
| RECEPTOR | E.ARG_396 | NH1    | E.GLU_412  | OE2    | 2.717        |
| RECEPTOR | E.ARG_420 | NH1    | E.ASP_171  | OD1    | 3.769        |
| RECEPTOR | E.ARG_420 | NH2    | E.ASP_171  | OD1    | 2.750        |
| RECEPTOR | E.ARG_420 | NH2    | E.ASP_171  | OD2    | 2.677        |
| RECEPTOR | E.ARG_420 | NH2    | E.ASP_237  | OD2    | 3.814        |
| RECEPTOR | E.ARG_432 | NH1    | E.GLU_1054 | OE1    | 3.586        |
| RECEPTOR | E.LYS_442 | NZ     | E.GLU_105  | OE1    | 3.982        |
| RECEPTOR | E.LYS_442 | NZ     | E.GLU_105  | OE2    | 2.575        |
| RECEPTOR | E.ARG_499 | NH1    | E.ASP_496  | OD1    | 2.642        |
| RECEPTOR | E.ARG_503 | NH2    | E.GLU_745  | OE2    | 2.942        |
| RECEPTOR | E.HIS_524 | NE2    | E.GLU_546  | OE1    | 2.736        |
| RECEPTOR | E.LYS_530 | NZ     | E.GLU_536  | OE1    | 2.617        |
| RECEPTOR | E.LYS_552 | NZ     | E.GLU_546  | OE2    | 2.668        |
| RECEPTOR | E.ARG_556 | NH1    | E.ASP_541  | OD1    | 2.642        |
| RECEPTOR | E.ARG_556 | NH1    | E.ASP_541  | OD2    | 3.053        |
| RECEPTOR | E.ARG_556 | NH2    | E.ASP_541  | OD1    | 3.841        |
| RECEPTOR | E.ARG_556 | NH2    | E.ASP_541  | OD2    | 3.614        |
| RECEPTOR | E.LYS_558 | NZ     | E.GLU_563  | OE1    | 3.644        |
| RECEPTOR | E.LYS_574 | NZ     | E.GLU_578  | OE1    | 2.573        |
| RECEPTOR | E.ARG_579 | NH2    | E.ASP_577  | OD2    | 2.911        |
| RECEPTOR | E.ARG_586 | NH1    | E.ASP_757  | OD1    | 2.661        |
| RECEPTOR | E.ARG_586 | NH1    | E.ASP_757  | OD2    | 2.677        |

|          |            |     |           |     |       |
|----------|------------|-----|-----------|-----|-------|
| RECEPTOR | E_LYS_613  | NZ  | E_GLU_71  | OE1 | 3.917 |
| RECEPTOR | E_LYS_613  | NZ  | E_GLU_71  | OE2 | 2.570 |
| RECEPTOR | E_LYS_615  | NZ  | E_ASP_66  | OD1 | 3.911 |
| RECEPTOR | E_ARG_652  | NH2 | E_ASP_725 | OD1 | 3.724 |
| RECEPTOR | E_ARG_692  | NH2 | E_ASP_725 | OD2 | 3.430 |
| RECEPTOR | E_LYS_718  | NZ  | E_ASP_805 | OD1 | 3.365 |
| RECEPTOR | E_ARG_754  | NH1 | E_ASP_843 | OD1 | 3.846 |
| RECEPTOR | E_ARG_754  | NH2 | E_ASP_582 | OD1 | 2.635 |
| RECEPTOR | E_ARG_754  | NH2 | E_ASP_582 | OD2 | 3.602 |
| RECEPTOR | E_ARG_754  | NH2 | E_ASP_843 | OD1 | 3.241 |
| RECEPTOR | E_ARG_754  | NH2 | E_ASP_843 | OD2 | 3.196 |
| RECEPTOR | E_LYS_796  | NZ  | E_ASP_759 | OD1 | 3.240 |
| RECEPTOR | E_ARG_831  | NH1 | E_ASP_853 | OD1 | 2.776 |
| RECEPTOR | E_ARG_831  | NH1 | E_ASP_853 | OD2 | 2.814 |
| RECEPTOR | E_ARG_861  | NH1 | E_GLU_865 | OE1 | 2.786 |
| RECEPTOR | E_ARG_861  | NH2 | E_GLU_865 | OE1 | 3.266 |
| RECEPTOR | E_LYS_884  | NZ  | E_GLU_965 | OE1 | 3.364 |
| RECEPTOR | E_LYS_884  | NZ  | E_GLU_965 | OE2 | 3.301 |
| RECEPTOR | E_LYS_899  | NZ  | E_ASP_320 | OD1 | 3.025 |
| RECEPTOR | E_LYS_976  | NZ  | E_ASP_974 | OD1 | 3.874 |
| RECEPTOR | E_ARG_1039 | NH1 | E_ASP_541 | OD2 | 2.734 |
| RECEPTOR | E_ARG_1039 | NH1 | E_ASP_544 | OD1 | 3.406 |
| RECEPTOR | E_ARG_1039 | NH1 | E_ASP_544 | OD2 | 2.621 |
| RECEPTOR | E_ARG_1039 | NH2 | E_ASP_544 | OD1 | 2.755 |
| RECEPTOR | E_ARG_1039 | NH2 | E_ASP_544 | OD2 | 3.588 |
| RECEPTOR | E_ARG_1039 | NH2 | E_GLU_548 | OE1 | 3.791 |
| RECEPTOR | E_ARG_1041 | NH1 | E_ASP_286 | OD1 | 3.301 |

Table 1: Salt bridging networks within the structural model represented in RECEPTOR.pdb.

In this table, the residue naming scheme is **Chain ID\_residue name\_residue number**.

| Count | Residue A | Residue B |
|-------|-----------|-----------|
| 4     | ARG383    | GLU1054   |
| 4     | ARG556    | ASP541    |
| 4     | ARG1039   | ASP544    |
| 3     | ARG754    | ASP843    |
| 3     | ARG99     | GLU199    |
| 3     | ARG420    | ASP171    |
| 2     | LYS319    | GLU281    |
| 2     | LYS106    | GLU103    |
| 2     | LYS380    | GLU405    |
| 2     | ARG93     | ASP200    |
| 2     | LYS884    | GLU965    |
| 2     | ARG754    | ASP582    |
| 2     | LYS252    | ASP287    |
| 2     | ARG396    | GLU412    |
| 2     | LYS613    | GLU71     |
| 2     | LYS442    | GLU105    |
| 2     | ARG861    | GLU865    |
| 2     | ARG831    | ASP853    |
| 2     | LYS63     | GLU702    |
| 2     | ARG586    | ASP757    |
| 2     | ARG216    | ASP190    |
| 2     | ARG239    | ASP237    |
| 1     | LYS718    | ASP805    |
| 1     | ARG1039   | GLU548    |
| 1     | LYS796    | ASP759    |
| 1     | LYS574    | GLU578    |
| 1     | LYS34     | GLU994    |
| 1     | ARG1041   | ASP286    |
| 1     | LYS899    | ASP320    |
| 1     | ARG240    | GLU278    |
| 1     | LYS558    | GLU563    |
| 1     | LYS381    | ASP379    |
| 1     | ARG432    | GLU1054   |
| 1     | ARG144    | GLU174    |
| 1     | ARG84     | GLU80     |
| 1     | LYS530    | GLU536    |
| 1     | ARG1039   | ASP541    |
| 1     | LYS976    | ASP974    |
| 1     | ARG692    | ASP725    |
| 1     | ARG195    | GLU191    |
| 1     | LYS552    | GLU546    |
| 1     | ARG499    | ASP496    |
| 1     | ARG503    | GLU745    |
| 1     | ARG351    | ASP253    |
| 1     | ARG579    | ASP577    |
| 1     | ARG652    | ASP725    |
| 1     | LYS615    | ASP66     |
| 1     | ARG76     | GLU566    |
| 1     | ARG135    | GLU137    |
| 1     | HIS524    | GLU546    |
| 1     | LYS34     | ASP38     |
| 1     | ARG420    | ASP237    |
| 1     | HIS167    | ASP234    |

---

Table 2: Counting of side chain salt bridging networks within the structural model represented in RECEPTOR.pdb. In this table, the residue naming scheme is **Chain ID\_residue name\_residue number**.

| PDB          | Acceptor (A)   | Donor (D)      | Hydrogen (H)    | D-A (Å) | H-A (Å) | $\angle ADH(^{\circ})$ |
|--------------|----------------|----------------|-----------------|---------|---------|------------------------|
| RECEPTOR.PDB | O, E.PRO.30    | N, E.LYS.34    | H, E.LYS.34     | 2.94    | 1.98    | 14.21                  |
| RECEPTOR.PDB | O, E.VAL.31    | N, E.SER.35    | H, E.SER.35     | 2.91    | 1.91    | 6.86                   |
| RECEPTOR.PDB | O, E.ILE.33    | N, E.VAL.37    | H, E.VAL.37     | 2.73    | 1.81    | 19.33                  |
| RECEPTOR.PDB | O, E.VAL.37    | N, E.MET.40    | H, E.MET.40     | 2.91    | 1.91    | 4.20                   |
| RECEPTOR.PDB | O, E.GLN.41    | N, E.VAL.45    | H, E.VAL.45     | 2.83    | 1.83    | 4.69                   |
| RECEPTOR.PDB | O, E.GLU.42    | N, E.THR.46    | H, E.THR.46     | 2.95    | 1.98    | 13.80                  |
| RECEPTOR.PDB | O, E.ASP.43    | N, E.LEU.47    | H, E.LEU.47     | 2.93    | 1.95    | 11.52                  |
| RECEPTOR.PDB | O, E.LEU.44    | N, E.ALA.48    | H, E.ALA.48     | 2.79    | 1.81    | 10.84                  |
| RECEPTOR.PDB | O, E.VAL.45    | N, E.LYS.49    | H, E.LYS.49     | 2.72    | 1.73    | 9.56                   |
| RECEPTOR.PDB | OH, E.TYR.761  | NZ, E.LYS.49   | HZ3, E.LYS.49   | 2.82    | 1.87    | 15.75                  |
| RECEPTOR.PDB | O, E.ALA.48    | OG, E.SER.52   | HG, E.SER.52    | 2.87    | 2.04    | 25.07                  |
| RECEPTOR.PDB | O, E.GLY.53    | N, E.LEU.57    | H, E.LEU.57     | 2.92    | 1.92    | 7.58                   |
| RECEPTOR.PDB | O, E.THR.55    | N, E.ASP.59    | H, E.ASP.59     | 2.89    | 1.91    | 12.19                  |
| RECEPTOR.PDB | O, E.ASP.59    | N, E.LYS.63    | H, E.LYS.63     | 2.72    | 1.90    | 29.02                  |
| RECEPTOR.PDB | OE2, E.GLU.702 | NZ, E.LYS.63   | HZ3, E.LYS.63   | 2.55    | 1.67    | 23.67                  |
| RECEPTOR.PDB | OE1, E.GLU.702 | OH, E.TYR.64   | HH, E.TYR.64    | 2.58    | 1.69    | 17.39                  |
| RECEPTOR.PDB | O, E.GLU.62    | NE2, E.GLN.65  | HE21, E.GLN.65  | 2.85    | 1.89    | 14.40                  |
| RECEPTOR.PDB | O, E.TYR.64    | N, E.ASP.66    | H, E.ASP.66     | 2.62    | 1.80    | 28.10                  |
| RECEPTOR.PDB | O, E.TYR.61    | OH, E.TYR.68   | HH, E.TYR.68    | 2.78    | 1.86    | 12.52                  |
| RECEPTOR.PDB | O, E.PHE.609   | N, E.ASN.73    | H, E.ASN.73     | 2.74    | 1.88    | 25.24                  |
| RECEPTOR.PDB | O, E.SER.608   | ND2, E.ASN.73  | HD21, E.ASN.73  | 2.83    | 1.85    | 11.46                  |
| RECEPTOR.PDB | O, E.GLY.565   | NH1, E.ARG.76  | HH12, E.ARG.76  | 2.92    | 1.98    | 17.36                  |
| RECEPTOR.PDB | O, E.TRP.590   | NH2, E.ARG.76  | HH22, E.ARG.76  | 2.82    | 1.86    | 13.91                  |
| RECEPTOR.PDB | O, E.ASN.74    | N, E.LEU.78    | H, E.LEU.78     | 2.84    | 1.84    | 8.14                   |
| RECEPTOR.PDB | O, E.GLN.77    | N, E.ILE.81    | H, E.ILE.81     | 2.89    | 1.90    | 9.77                   |
| RECEPTOR.PDB | O, E.VAL.79    | N, E.ALA.83    | H, E.ALA.83     | 2.85    | 1.88    | 12.75                  |
| RECEPTOR.PDB | O, E.ARG.84    | N, E.LYS.88    | H, E.LYS.88     | 2.82    | 1.82    | 8.28                   |
| RECEPTOR.PDB | O, E.ASP.85    | N, E.LEU.89    | H, E.LEU.89     | 2.81    | 1.82    | 9.70                   |
| RECEPTOR.PDB | O, E.ILE.86    | N, E.LEU.90    | H, E.LEU.90     | 3.00    | 2.00    | 7.43                   |
| RECEPTOR.PDB | O, E.GLU.87    | N, E.SER.91    | H, E.SER.91     | 2.83    | 1.85    | 12.48                  |
| RECEPTOR.PDB | O, E.LYS.88    | N, E.ASN.92    | H, E.ASN.92     | 2.78    | 1.79    | 9.61                   |
| RECEPTOR.PDB | O, E.LEU.90    | N, E.SER.94    | H, E.SER.94     | 2.92    | 1.98    | 17.38                  |
| RECEPTOR.PDB | O, E.SER.94    | N, E.VAL.98    | H, E.VAL.98     | 2.99    | 2.03    | 15.26                  |
| RECEPTOR.PDB | OD1, E.ASN.196 | NH1, E.ARG.99  | HH11, E.ARG.99  | 2.68    | 1.70    | 11.75                  |
| RECEPTOR.PDB | O, E.VAL.98    | N, E.MET.102   | H, E.MET.102    | 2.98    | 1.99    | 9.33                   |
| RECEPTOR.PDB | O, E.LEU.100   | N, E.ALA.104   | H, E.ALA.104    | 2.90    | 1.90    | 8.50                   |
| RECEPTOR.PDB | O, E.ALA.101   | N, E.GLU.105   | H, E.GLU.105    | 2.94    | 1.94    | 5.92                   |
| RECEPTOR.PDB | OE1, E.GLU.103 | NZ, E.LYS.106  | HZ1, E.LYS.106  | 2.61    | 1.71    | 21.86                  |
| RECEPTOR.PDB | O, E.GLU.103   | N, E.VAL.107   | H, E.VAL.107    | 2.75    | 1.77    | 10.40                  |
| RECEPTOR.PDB | OD1, E.ASN.181 | NE2, E.HIS.111 | HE2, E.HIS.111  | 2.75    | 1.77    | 11.13                  |
| RECEPTOR.PDB | OD1, E.ASN.184 | NE, E.ARG.114  | HE, E.ARG.114   | 2.74    | 1.86    | 24.17                  |
| RECEPTOR.PDB | O, E.ASN.120   | NH1, E.ARG.114 | HH12, E.ARG.114 | 2.89    | 1.96    | 18.60                  |
| RECEPTOR.PDB | O, E.VAL.166   | N, E.ALA.127   | H, E.ALA.127    | 2.74    | 1.76    | 11.15                  |
| RECEPTOR.PDB | OE2, E.GLU.137 | NH1, E.ARG.135 | HH11, E.ARG.135 | 2.67    | 1.74    | 17.34                  |
| RECEPTOR.PDB | O, E.VAL.122   | N, E.GLN.143   | H, E.GLN.143    | 2.89    | 1.90    | 10.11                  |
| RECEPTOR.PDB | OH, E.TYR.124  | NH1, E.ARG.144 | HH12, E.ARG.144 | 2.85    | 1.98    | 24.37                  |
| RECEPTOR.PDB | OD1, E.ASP.152 | N, E.ALA.153   | H, E.ALA.153    | 2.80    | 1.90    | 22.54                  |
| RECEPTOR.PDB | O, E.PHE.155   | N, E.ARG.157   | H, E.ARG.157    | 2.99    | 2.13    | 26.07                  |
| RECEPTOR.PDB | O, E.PRO.222   | NH1, E.ARG.157 | HH12, E.ARG.157 | 2.64    | 1.81    | 27.30                  |
| RECEPTOR.PDB | O, E.ILE.150   | N, E.ILE.159   | H, E.ILE.159    | 2.82    | 1.82    | 8.15                   |
| RECEPTOR.PDB | O, E.ALA.220   | N, E.SER.160   | H, E.SER.160    | 2.73    | 1.84    | 23.08                  |
| RECEPTOR.PDB | OD2, E.ASP.152 | OH, E.TYR.161  | HH, E.TYR.161   | 2.55    | 1.75    | 27.20                  |
| RECEPTOR.PDB | O, E.TYR.217   | N, E.ALA.165   | H, E.ALA.165    | 2.81    | 2.00    | 29.85                  |
| RECEPTOR.PDB | O, E.ALA.215   | N, E.HIS.167   | H, E.HIS.167    | 2.73    | 1.77    | 14.30                  |
| RECEPTOR.PDB | OD2, E.ASP.234 | NE2, E.HIS.167 | HE2, E.HIS.167  | 2.81    | 1.81    | 5.73                   |
| RECEPTOR.PDB | O, E.SER.176   | N, E.LEU.180   | H, E.LEU.180    | 2.91    | 1.91    | 7.64                   |
| RECEPTOR.PDB | OE2, E.GLU.182 | NE1, E.TRP.185 | HE1, E.TRP.185  | 2.71    | 1.84    | 24.46                  |

|              |                |                |                 |      |      |       |
|--------------|----------------|----------------|-----------------|------|------|-------|
| RECEPTOR.PDB | O, E_GLU_182   | N, E_THR_186   | H, E_THR_186    | 2.84 | 1.87 | 12.70 |
| RECEPTOR.PDB | O, E_LEU_183   | OG, E_SER_187  | HG, E_SER_187   | 2.76 | 1.91 | 22.46 |
| RECEPTOR.PDB | O, E_LEU_189   | N, E_PHE_193   | H, E_PHE_193    | 2.81 | 1.80 | 3.11  |
| RECEPTOR.PDB | O, E_GLN_162   | NZ, E_LYS_194  | HZ3, E_LYS_194  | 2.70 | 1.73 | 13.78 |
| RECEPTOR.PDB | OE2, E_GLU_191 | NH1, E_ARG_195 | HH11, E_ARG_195 | 2.53 | 1.55 | 9.17  |
| RECEPTOR.PDB | OE1, E_GLN_206 | ND2, E_ASN_196 | HD21, E_ASN_196 | 2.66 | 1.78 | 22.72 |
| RECEPTOR.PDB | O, E_LYS_194   | N, E_ASP_198   | H, E_ASP_198    | 2.88 | 1.89 | 10.48 |
| RECEPTOR.PDB | O, E_ASN_196   | N, E_ASP_200   | H, E_ASP_200    | 2.84 | 1.89 | 15.34 |
| RECEPTOR.PDB | O, E_GLY_489   | N, E_VAL_207   | H, E_VAL_207    | 2.95 | 1.98 | 13.51 |
| RECEPTOR.PDB | O, E_ARG_216   | N, E_PHE_208   | H, E_PHE_208    | 2.88 | 1.91 | 12.83 |
| RECEPTOR.PDB | O, E_VAL_487   | N, E_GLY_209   | H, E_GLY_209    | 2.77 | 1.79 | 12.19 |
| RECEPTOR.PDB | O, E_LEU_214   | N, E_SER_210   | H, E_SER_210    | 2.76 | 1.80 | 15.49 |
| RECEPTOR.PDB | OE1, E_GLU_182 | OG, E_SER_210  | HG, E_SER_210   | 2.55 | 1.66 | 17.72 |
| RECEPTOR.PDB | O, E_LEU_485   | N, E_ALA_211   | H, E_ALA_211    | 2.81 | 1.82 | 8.45  |
| RECEPTOR.PDB | O, E_HIS_167   | N, E_ALA_215   | H, E_ALA_215    | 2.92 | 1.92 | 4.63  |
| RECEPTOR.PDB | O, E_PHE_208   | N, E_ARG_216   | H, E_ARG_216    | 2.96 | 2.00 | 14.10 |
| RECEPTOR.PDB | OD1, E_ASP_190 | NH2, E_ARG_216 | HH21, E_ARG_216 | 2.67 | 1.79 | 23.24 |
| RECEPTOR.PDB | O, E_ALA_165   | N, E_TYR_217   | H, E_TYR_217    | 2.95 | 1.97 | 11.25 |
| RECEPTOR.PDB | O, E_GLN_206   | N, E_TYR_218   | H, E_TYR_218    | 2.94 | 1.96 | 12.40 |
| RECEPTOR.PDB | O, E_TYR_161   | OH, E_TYR_218  | HH, E_TYR_218   | 2.83 | 1.95 | 19.75 |
| RECEPTOR.PDB | O, E_LEU_937   | ND2, E_ASN_231 | HD21, E_ASN_231 | 2.83 | 1.97 | 25.12 |
| RECEPTOR.PDB | OD1, E_ASP_237 | N, E_ARG_239   | H, E_ARG_239    | 2.81 | 1.86 | 15.87 |
| RECEPTOR.PDB | OD1, E_ASP_237 | NE, E_ARG_239  | HE, E_ARG_239   | 2.70 | 1.73 | 13.07 |
| RECEPTOR.PDB | OD2, E_ASP_237 | NH1, E_ARG_239 | HH11, E_ARG_239 | 2.87 | 1.92 | 16.36 |
| RECEPTOR.PDB | O, E_ALA_211   | NH2, E_ARG_239 | HH21, E_ARG_239 | 2.80 | 1.90 | 22.39 |
| RECEPTOR.PDB | O, E_ARG_241   | N, E_ILE_245   | H, E_ILE_245    | 3.00 | 2.01 | 11.16 |
| RECEPTOR.PDB | OD1, E_ASP_287 | NZ, E_LYS_252  | HZ1, E_LYS_252  | 2.79 | 1.89 | 21.20 |
| RECEPTOR.PDB | O, E_PHE_288   | N, E_MET_254   | H, E_MET_254    | 2.76 | 1.82 | 17.21 |
| RECEPTOR.PDB | O, E_MET_359   | N, E_LEU_257   | H, E_LEU_257    | 2.71 | 1.73 | 11.16 |
| RECEPTOR.PDB | O, E_ALA_292   | N, E_VAL_258   | H, E_VAL_258    | 2.96 | 2.14 | 29.21 |
| RECEPTOR.PDB | O, E_PHE_361   | N, E_ASP_259   | H, E_ASP_259    | 3.00 | 2.02 | 11.40 |
| RECEPTOR.PDB | OD1, E_ASP_259 | N, E_SER_261   | H, E_SER_261    | 2.98 | 1.99 | 10.55 |
| RECEPTOR.PDB | O, E_GLY_329   | N, E_GLY_262   | H, E_GLY_262    | 2.87 | 1.94 | 18.55 |
| RECEPTOR.PDB | O, E_LEU_271   | N, E_SER_275   | H, E_SER_275    | 2.94 | 1.94 | 7.15  |
| RECEPTOR.PDB | O, E_ILE_272   | N, E_VAL_276   | H, E_VAL_276    | 2.89 | 1.90 | 8.24  |
| RECEPTOR.PDB | O, E_THR_274   | N, E_GLU_278   | H, E_GLU_278    | 2.92 | 1.92 | 6.05  |
| RECEPTOR.PDB | O, E_SER_275   | N, E_MET_279   | H, E_MET_279    | 2.80 | 1.85 | 15.06 |
| RECEPTOR.PDB | O, E_SER_284   | N, E_ASP_287   | H, E_ASP_287    | 2.85 | 1.98 | 25.32 |
| RECEPTOR.PDB | O, E_LYS_252   | N, E_PHE_288   | H, E_PHE_288    | 2.82 | 1.90 | 19.45 |
| RECEPTOR.PDB | O, E_VAL_308   | N, E_VAL_289   | H, E_VAL_289    | 2.81 | 1.82 | 9.70  |
| RECEPTOR.PDB | OE1, E_GLN_343 | ND2, E_ASN_290 | HD21, E_ASN_290 | 2.87 | 1.94 | 19.14 |
| RECEPTOR.PDB | OD1, E_ASN_290 | N, E_VAL_291   | H, E_VAL_291    | 2.77 | 1.94 | 28.25 |
| RECEPTOR.PDB | O, E_ILE_256   | N, E_ALA_292   | H, E_ALA_292    | 2.79 | 1.80 | 8.07  |
| RECEPTOR.PDB | O, E_GLN_299   | N, E_SER_293   | H, E_SER_293    | 2.96 | 1.96 | 5.44  |
| RECEPTOR.PDB | O, E_VAL_258   | N, E_PHE_294   | H, E_PHE_294    | 2.98 | 2.02 | 15.24 |
| RECEPTOR.PDB | O, E_ASN_297   | N, E_ASN_295   | H, E_ASN_295    | 2.90 | 1.91 | 10.82 |
| RECEPTOR.PDB | O, E_LYS_328   | ND2, E_ASN_295 | HD21, E_ASN_295 | 2.70 | 1.78 | 19.10 |
| RECEPTOR.PDB | O, E_ASN_295   | OG, E_SER_296  | HG, E_SER_296   | 2.84 | 2.03 | 27.35 |
| RECEPTOR.PDB | O, E_ASN_295   | N, E_ASN_297   | H, E_ASN_297    | 2.91 | 2.05 | 26.04 |
| RECEPTOR.PDB | OD1, E_ASN_295 | NE2, E_GLN_299 | HE22, E_GLN_299 | 2.83 | 1.86 | 13.53 |
| RECEPTOR.PDB | O, E_VAL_291   | N, E_VAL_301   | H, E_VAL_301    | 3.00 | 2.02 | 11.14 |
| RECEPTOR.PDB | O, E_VAL_289   | N, E_VAL_308   | H, E_VAL_308    | 2.89 | 1.89 | 4.35  |
| RECEPTOR.PDB | OD1, E_ASN_311 | N, E_ASN_314   | H, E_ASN_314    | 2.87 | 1.88 | 7.89  |
| RECEPTOR.PDB | O, E_LYS_315   | N, E_LYS_319   | H, E_LYS_319    | 2.86 | 1.86 | 8.32  |
| RECEPTOR.PDB | O, E_LEU_318   | N, E_VAL_322   | H, E_VAL_322    | 2.89 | 1.92 | 13.27 |
| RECEPTOR.PDB | O, E_VAL_260   | N, E_LYS_328   | H, E_LYS_328    | 2.89 | 1.92 | 13.72 |
| RECEPTOR.PDB | O, E_TYR_333   | N, E_PHE_337   | H, E_PHE_337    | 2.97 | 1.98 | 7.79  |
| RECEPTOR.PDB | O, E_LYS_334   | N, E_SER_338   | H, E_SER_338    | 2.94 | 1.97 | 11.65 |

|              |                |                |                 |      |      |       |
|--------------|----------------|----------------|-----------------|------|------|-------|
| RECEPTOR.PDB | O, E.ASN.346   | N, E.ASN.348   | H, E.ASN.348    | 2.67 | 1.76 | 19.82 |
| RECEPTOR.PDB | OD1, E.ASP.253 | N, E.ALA.352   | H, E.ALA.352    | 2.93 | 2.00 | 18.26 |
| RECEPTOR.PDB | OD2, E.ASP.253 | N, E.ASN.353   | H, E.ASN.353    | 2.71 | 1.85 | 25.68 |
| RECEPTOR.PDB | O, E.ARG.383   | N, E.ILE.358   | H, E.ILE.358    | 2.91 | 1.91 | 6.79  |
| RECEPTOR.PDB | OD1, E.ASP.363 | N, E.GLY.364   | H, E.GLY.364    | 2.67 | 1.78 | 22.62 |
| RECEPTOR.PDB | O, E.ASP.395   | N, E.GLY.365   | H, E.GLY.365    | 2.99 | 2.10 | 22.61 |
| RECEPTOR.PDB | OD1, E.ASN.406 | ND2, E.ASN.377 | HD22, E.ASN.377 | 2.70 | 1.74 | 14.00 |
| RECEPTOR.PDB | O, E.ASN.377   | N, E.LYS.380   | H, E.LYS.380    | 2.82 | 1.89 | 17.69 |
| RECEPTOR.PDB | O, E.GLU.405   | NZ, E.LYS.380  | HZ1, E.LYS.380  | 2.83 | 1.95 | 24.20 |
| RECEPTOR.PDB | OD2, E.ASP.379 | NZ, E.LYS.381  | HZ1, E.LYS.381  | 2.56 | 1.75 | 29.39 |
| RECEPTOR.PDB | O, E.ILE.399   | OG1, E.THR.386 | HG1, E.THR.386  | 2.85 | 1.92 | 12.47 |
| RECEPTOR.PDB | O, E.LEU.360   | N, E.PHE.387   | H, E.PHE.387    | 2.93 | 2.00 | 19.08 |
| RECEPTOR.PDB | O, E.TYR.411   | N, E.SER.388   | H, E.SER.388    | 2.97 | 2.00 | 13.12 |
| RECEPTOR.PDB | O, E.ASP.363   | OG, E.SER.388  | HG, E.SER.388   | 2.96 | 2.08 | 19.68 |
| RECEPTOR.PDB | O, E.THR.362   | N, E.VAL.389   | H, E.VAL.389    | 2.95 | 2.07 | 24.20 |
| RECEPTOR.PDB | O, E.ILE.413   | N, E.GLY.390   | H, E.GLY.390    | 2.77 | 1.79 | 10.85 |
| RECEPTOR.PDB | ND1, E.HIS.392 | N, E.TYR.394   | H, E.TYR.394    | 2.99 | 2.13 | 26.24 |
| RECEPTOR.PDB | OD1, E.ASP.395 | N, E.GLY.397   | H, E.GLY.397    | 2.81 | 1.81 | 6.94  |
| RECEPTOR.PDB | O, E.GLN.400   | N, E.CYS.404   | H, E.CYS.404    | 2.96 | 1.97 | 8.24  |
| RECEPTOR.PDB | O, E.TRP.401   | N, E.GLU.405   | H, E.GLU.405    | 2.95 | 1.97 | 10.98 |
| RECEPTOR.PDB | O, E.MET.402   | ND2, E.ASN.406 | HD21, E.ASN.406 | 2.75 | 1.77 | 11.21 |
| RECEPTOR.PDB | OE2, E.GLU.412 | OH, E.TYR.410  | HH, E.TYR.410   | 2.72 | 1.80 | 13.73 |
| RECEPTOR.PDB | O, E.SER.388   | N, E.ILE.413   | H, E.ILE.413    | 2.89 | 1.90 | 10.80 |
| RECEPTOR.PDB | OD1, E.ASP.171 | NH2, E.ARG.420 | HH22, E.ARG.420 | 2.75 | 1.83 | 19.88 |
| RECEPTOR.PDB | O, E.ILE.419   | OG1, E.THR.423 | HG1, E.THR.423  | 2.99 | 2.18 | 27.12 |
| RECEPTOR.PDB | OD2, E.ASP.237 | NE2, E.GLN.424 | HE22, E.GLN.424 | 2.98 | 1.97 | 5.44  |
| RECEPTOR.PDB | O, E.LEU.427   | N, E.GLY.431   | H, E.GLY.431    | 2.77 | 1.89 | 24.47 |
| RECEPTOR.PDB | O, E.ASP.439   | N, E.LYS.442   | H, E.LYS.442    | 2.97 | 2.00 | 14.33 |
| RECEPTOR.PDB | OE2, E.GLU.105 | NZ, E.LYS.442  | HZ1, E.LYS.442  | 2.57 | 1.75 | 28.10 |
| RECEPTOR.PDB | O, E.THR.461   | N, E.THR.447   | H, E.THR.447    | 2.92 | 1.92 | 6.18  |
| RECEPTOR.PDB | O, E.TYR.450   | N, E.VAL.459   | H, E.VAL.459    | 2.77 | 1.76 | 3.87  |
| RECEPTOR.PDB | O, E.VAL.492   | N, E.ILE.460   | H, E.ILE.460    | 2.94 | 1.94 | 7.11  |
| RECEPTOR.PDB | OD1, E.ASP.491 | OG1, E.THR.461 | HG1, E.THR.461  | 2.98 | 2.09 | 17.09 |
| RECEPTOR.PDB | O, E.VAL.490   | N, E.GLY.462   | H, E.GLY.462    | 2.93 | 1.96 | 13.01 |
| RECEPTOR.PDB | O, E.GLN.445   | N, E.THR.463   | H, E.THR.463    | 2.81 | 1.92 | 22.12 |
| RECEPTOR.PDB | O, E.MET.488   | N, E.LEU.464   | H, E.LEU.464    | 2.94 | 1.94 | 8.70  |
| RECEPTOR.PDB | O, E.GLY.486   | N, E.VAL.466   | H, E.VAL.466    | 2.89 | 1.89 | 6.33  |
| RECEPTOR.PDB | OE2, E.GLU.105 | N, E.PHE.467   | H, E.PHE.467    | 2.85 | 1.85 | 7.28  |
| RECEPTOR.PDB | O, E.GLY.471   | N, E.ASN.475   | H, E.ASN.475    | 2.94 | 2.10 | 27.64 |
| RECEPTOR.PDB | OE1, E.GLU.474 | N, E.LYS.476   | H, E.LYS.476    | 2.88 | 2.02 | 25.61 |
| RECEPTOR.PDB | O, E.ASN.468   | ND2, E.ASN.481 | HD21, E.ASN.481 | 2.84 | 1.85 | 9.49  |
| RECEPTOR.PDB | OG1, E.THR.470 | ND2, E.ASN.481 | HD22, E.ASN.481 | 2.91 | 1.92 | 7.62  |
| RECEPTOR.PDB | O, E.VAL.466   | N, E.LEU.485   | H, E.LEU.485    | 2.75 | 1.87 | 23.86 |
| RECEPTOR.PDB | O, E.GLY.209   | N, E.VAL.487   | H, E.VAL.487    | 2.79 | 1.81 | 11.00 |
| RECEPTOR.PDB | O, E.LEU.464   | N, E.MET.488   | H, E.MET.488    | 2.89 | 1.89 | 4.58  |
| RECEPTOR.PDB | O, E.VAL.207   | N, E.GLY.489   | H, E.GLY.489    | 2.90 | 1.89 | 5.37  |
| RECEPTOR.PDB | O, E.ILE.460   | N, E.VAL.492   | H, E.VAL.492    | 2.80 | 1.79 | 4.15  |
| RECEPTOR.PDB | O, E.ILE.497   | N, E.LEU.500   | H, E.LEU.500    | 2.97 | 2.02 | 16.21 |
| RECEPTOR.PDB | O, E.CYS.507   | N, E.GLY.510   | H, E.GLY.510    | 2.84 | 1.89 | 15.28 |
| RECEPTOR.PDB | O, E.ALA.601   | N, E.PHE.513   | H, E.PHE.513    | 2.80 | 1.82 | 11.12 |
| RECEPTOR.PDB | O, E.SER.599   | N, E.ILE.515   | H, E.ILE.515    | 2.88 | 2.05 | 28.50 |
| RECEPTOR.PDB | O, E.TYR.520   | N, E.ASP.516   | H, E.ASP.516    | 2.97 | 1.97 | 8.44  |
| RECEPTOR.PDB | OD2, E.ASP.285 | OH, E.TYR.520  | HH, E.TYR.520   | 2.54 | 1.72 | 25.96 |
| RECEPTOR.PDB | O, E.LEU.540   | N, E.VAL.521   | H, E.VAL.521    | 2.92 | 1.92 | 8.74  |
| RECEPTOR.PDB | OE1, E.GLU.546 | NE2, E.HIS.524 | HE2, E.HIS.524  | 2.74 | 1.76 | 12.33 |
| RECEPTOR.PDB | OE1, E.GLN.889 | N, E.GLN.528   | H, E.GLN.528    | 2.98 | 2.04 | 17.54 |
| RECEPTOR.PDB | OE1, E.GLU.536 | NZ, E.LYS.530  | HZ1, E.LYS.530  | 2.62 | 1.79 | 27.88 |
| RECEPTOR.PDB | OE1, E.GLU.536 | OG, E.SER.534  | HG, E.SER.534   | 2.51 | 1.58 | 10.42 |

|              |                |                |                 |      |      |       |
|--------------|----------------|----------------|-----------------|------|------|-------|
| RECEPTOR.PDB | O, E.VAL.449   | N, E.VAL.538   | H, E.VAL.538    | 2.80 | 1.80 | 6.01  |
| RECEPTOR.PDB | OE2, E.GLU.546 | NZ, E.LYS.552  | HZ1, E.LYS.552  | 2.67 | 1.71 | 15.03 |
| RECEPTOR.PDB | O, E.LYS.552   | N, E.ARG.556   | H, E.ARG.556    | 2.83 | 1.84 | 9.88  |
| RECEPTOR.PDB | O, E.VAL.553   | N, E.ASN.557   | H, E.ASN.557    | 2.92 | 1.94 | 10.47 |
| RECEPTOR.PDB | O, E.TYR.588   | N, E.LYS.567   | H, E.LYS.567    | 2.76 | 1.86 | 22.33 |
| RECEPTOR.PDB | O, E.ARG.586   | N, E.PHE.569   | H, E.PHE.569    | 2.95 | 1.96 | 10.72 |
| RECEPTOR.PDB | O, E.ASP.582   | N, E.VAL.573   | H, E.VAL.573    | 2.79 | 1.79 | 7.32  |
| RECEPTOR.PDB | OE1, E.GLU.578 | NZ, E.LYS.574  | HZ1, E.LYS.574  | 2.57 | 1.76 | 28.91 |
| RECEPTOR.PDB | OE1, E.GLN.966 | NZ, E.LYS.574  | HZ3, E.LYS.574  | 2.63 | 1.76 | 24.11 |
| RECEPTOR.PDB | O, E.TYR.580   | N, E.SER.575   | H, E.SER.575    | 2.98 | 1.99 | 7.13  |
| RECEPTOR.PDB | O, E.ASP.577   | N, E.ARG.579   | H, E.ARG.579    | 2.69 | 1.78 | 20.43 |
| RECEPTOR.PDB | OD2, E.ASP.577 | NE, E.ARG.579  | HE, E.ARG.579   | 2.56 | 1.59 | 12.49 |
| RECEPTOR.PDB | O, E.VAL.573   | N, E.ASP.582   | H, E.ASP.582    | 2.94 | 1.94 | 7.31  |
| RECEPTOR.PDB | O, E.PHE.569   | N, E.ARG.586   | H, E.ARG.586    | 2.94 | 1.93 | 3.72  |
| RECEPTOR.PDB | OD1, E.ASP.757 | NH1, E.ARG.586 | HH11, E.ARG.586 | 2.66 | 1.76 | 21.42 |
| RECEPTOR.PDB | O, E.LEU.604   | N, E.THR.587   | H, E.THR.587    | 2.83 | 1.82 | 0.75  |
| RECEPTOR.PDB | O, E.LYS.567   | N, E.TYR.588   | H, E.TYR.588    | 2.75 | 1.76 | 8.86  |
| RECEPTOR.PDB | O, E.LEU.600   | N, E.THR.591   | H, E.THR.591    | 2.93 | 1.99 | 17.61 |
| RECEPTOR.PDB | O, E.TYR.598   | N, E.VAL.593   | H, E.VAL.593    | 2.89 | 1.95 | 16.88 |
| RECEPTOR.PDB | O, E.ILE.515   | N, E.SER.599   | H, E.SER.599    | 2.98 | 2.00 | 11.96 |
| RECEPTOR.PDB | O, E.THR.591   | OG, E.SER.599  | HG, E.SER.599   | 2.98 | 2.05 | 11.86 |
| RECEPTOR.PDB | O, E.THR.591   | N, E.LEU.600   | H, E.LEU.600    | 2.88 | 1.88 | 3.22  |
| RECEPTOR.PDB | O, E.PHE.513   | N, E.ALA.601   | H, E.ALA.601    | 2.73 | 1.75 | 10.11 |
| RECEPTOR.PDB | O, E.THR.589   | N, E.LEU.602   | H, E.LEU.602    | 2.84 | 1.90 | 16.63 |
| RECEPTOR.PDB | O, E.TYR.511   | N, E.VAL.603   | H, E.VAL.603    | 2.79 | 1.78 | 4.08  |
| RECEPTOR.PDB | O, E.THR.587   | N, E.LEU.604   | H, E.LEU.604    | 2.97 | 1.98 | 7.96  |
| RECEPTOR.PDB | O, E.PRO.605   | OG, E.SER.608  | HG, E.SER.608   | 2.97 | 2.10 | 20.38 |
| RECEPTOR.PDB | O, E.GLU.71    | N, E.TYR.611   | H, E.TYR.611    | 2.83 | 1.83 | 6.96  |
| RECEPTOR.PDB | OE2, E.GLU.71  | NZ, E.LYS.613  | HZ2, E.LYS.613  | 2.57 | 1.73 | 26.74 |
| RECEPTOR.PDB | O, E.LEU.67    | N, E.LYS.615   | H, E.LYS.615    | 2.92 | 1.97 | 15.86 |
| RECEPTOR.PDB | O, E.GLU.618   | N, E.GLN.622   | H, E.GLN.622    | 2.98 | 1.97 | 1.44  |
| RECEPTOR.PDB | O, E.ILE.616   | NE2, E.GLN.622 | HE21, E.GLN.622 | 2.86 | 1.92 | 17.44 |
| RECEPTOR.PDB | O, E.LEU.694   | NZ, E.LYS.627  | HZ3, E.LYS.627  | 2.79 | 1.96 | 28.62 |
| RECEPTOR.PDB | O, E.ARG.624   | N, E.GLY.628   | H, E.GLY.628    | 2.92 | 1.94 | 11.86 |
| RECEPTOR.PDB | O, E.LYS.637   | N, E.ASN.640   | H, E.ASN.640    | 2.84 | 1.95 | 22.87 |
| RECEPTOR.PDB | O, E.VAL.731   | N, E.TYR.646   | H, E.TYR.646    | 2.83 | 1.95 | 24.01 |
| RECEPTOR.PDB | O, E.THR.729   | N, E.PHE.648   | H, E.PHE.648    | 2.80 | 1.84 | 14.21 |
| RECEPTOR.PDB | O, E.ALA.650   | N, E.ARG.652   | H, E.ARG.652    | 2.79 | 1.93 | 25.65 |
| RECEPTOR.PDB | O, E.ALA.650   | OH, E.TYR.654  | HH, E.TYR.654   | 2.78 | 1.85 | 12.09 |
| RECEPTOR.PDB | O, E.SER.661   | N, E.ASN.663   | H, E.ASN.663    | 2.90 | 2.02 | 23.80 |
| RECEPTOR.PDB | O, E.ASN.664   | N, E.LEU.668   | H, E.LEU.668    | 2.85 | 1.86 | 7.92  |
| RECEPTOR.PDB | O, E.PHE.667   | N, E.PHE.671   | H, E.PHE.671    | 2.75 | 1.75 | 7.86  |
| RECEPTOR.PDB | O, E.LEU.668   | N, E.ASN.672   | H, E.ASN.672    | 2.90 | 2.04 | 25.85 |
| RECEPTOR.PDB | O, E.LEU.669   | N, E.GLU.673   | H, E.GLU.673    | 2.77 | 1.79 | 11.95 |
| RECEPTOR.PDB | O, E.GLU.673   | N, E.ARG.677   | H, E.ARG.677    | 2.94 | 1.93 | 6.05  |
| RECEPTOR.PDB | O, E.THR.687   | N, E.ASN.691   | H, E.ASN.691    | 2.94 | 2.06 | 24.65 |
| RECEPTOR.PDB | O, E.ILE.616   | ND2, E.ASN.691 | HD22, E.ASN.691 | 2.84 | 1.90 | 17.72 |
| RECEPTOR.PDB | O, E.ASP.688   | N, E.ARG.692   | H, E.ARG.692    | 2.93 | 1.96 | 13.13 |
| RECEPTOR.PDB | O, E.ASN.691   | N, E.LEU.695   | H, E.LEU.695    | 2.91 | 1.94 | 12.22 |
| RECEPTOR.PDB | O, E.ARG.692   | N, E.ASP.696   | H, E.ASP.696    | 2.94 | 1.95 | 8.60  |
| RECEPTOR.PDB | O, E.ILE.693   | N, E.ALA.697   | H, E.ALA.697    | 2.90 | 1.95 | 16.21 |
| RECEPTOR.PDB | O, E.ASP.696   | N, E.THR.700   | H, E.THR.700    | 2.84 | 1.85 | 9.53  |
| RECEPTOR.PDB | O, E.LYS.627   | ND2, E.ASN.701 | HD21, E.ASN.701 | 2.85 | 1.97 | 23.76 |
| RECEPTOR.PDB | O, E.ASN.701   | N, E.GLN.705   | H, E.GLN.705    | 2.78 | 1.77 | 2.84  |
| RECEPTOR.PDB | OE1, E.GLU.643 | NE2, E.GLN.705 | HE22, E.GLN.705 | 3.00 | 2.13 | 25.92 |
| RECEPTOR.PDB | O, E.GLU.702   | N, E.ASN.706   | H, E.ASN.706    | 2.85 | 1.90 | 16.78 |
| RECEPTOR.PDB | O, E.THR.50    | OH, E.TYR.707  | HH, E.TYR.707   | 2.57 | 1.78 | 28.32 |
| RECEPTOR.PDB | O, E.LEU.703   | N, E.TRP.708   | H, E.TRP.708    | 2.99 | 2.02 | 12.77 |

|              |                |                |                 |      |      |       |
|--------------|----------------|----------------|-----------------|------|------|-------|
| RECEPTOR.PDB | O, E.SER.52    | NE1, E.TRP.708 | HE1, E.TRP.708  | 2.77 | 1.84 | 17.38 |
| RECEPTOR.PDB | O, E.LYS.803   | N, E.LYS.718   | H, E.LYS.718    | 2.88 | 1.94 | 17.63 |
| RECEPTOR.PDB | O, E.VAL.799   | N, E.VAL.723   | H, E.VAL.723    | 2.89 | 1.97 | 18.85 |
| RECEPTOR.PDB | OD1, E.ASP.696 | OG1, E.THR.724 | HG1, E.THR.724  | 2.66 | 1.75 | 14.16 |
| RECEPTOR.PDB | O, E.THR.700   | NH2, E.ARG.730 | HH21, E.ARG.730 | 2.99 | 2.09 | 22.40 |
| RECEPTOR.PDB | O, E.ARG.720   | N, E.TYR.732   | H, E.TYR.732    | 2.93 | 1.99 | 18.01 |
| RECEPTOR.PDB | OD1, E.ASN.743 | N, E.GLU.745   | H, E.GLU.745    | 2.86 | 1.86 | 8.97  |
| RECEPTOR.PDB | O, E.LEU.506   | OH, E.TYR.747  | HH, E.TYR.747   | 2.63 | 1.79 | 24.04 |
| RECEPTOR.PDB | O, E.GLU.745   | N, E.GLU.748   | H, E.GLU.748    | 2.89 | 1.92 | 13.65 |
| RECEPTOR.PDB | OE1, E.GLN.576 | NZ, E.LYS.753  | HZ1, E.LYS.753  | 2.60 | 1.70 | 21.45 |
| RECEPTOR.PDB | OD2, E.ASP.582 | NE, E.ARG.754  | HE, E.ARG.754   | 2.70 | 1.71 | 8.99  |
| RECEPTOR.PDB | OD1, E.ASP.582 | NH2, E.ARG.754 | HH21, E.ARG.754 | 2.64 | 1.67 | 13.76 |
| RECEPTOR.PDB | O, E.PHE.751   | OG, E.SER.755  | HG, E.SER.755   | 2.91 | 1.99 | 13.42 |
| RECEPTOR.PDB | O, E.SER.783   | N, E.VAL.762   | H, E.VAL.762    | 2.96 | 1.99 | 12.97 |
| RECEPTOR.PDB | O, E.MET.781   | N, E.THR.764   | H, E.THR.764    | 2.77 | 1.80 | 13.04 |
| RECEPTOR.PDB | OE1, E.GLU.777 | N, E.ALA.775   | H, E.ALA.775    | 2.91 | 1.99 | 20.12 |
| RECEPTOR.PDB | O, E.ILE.802   | N, E.VAL.782   | H, E.VAL.782    | 2.87 | 1.88 | 9.44  |
| RECEPTOR.PDB | O, E.VAL.762   | N, E.SER.783   | H, E.SER.783    | 2.86 | 1.88 | 11.33 |
| RECEPTOR.PDB | O, E.VAL.800   | N, E.LYS.784   | H, E.LYS.784    | 2.97 | 1.99 | 11.52 |
| RECEPTOR.PDB | O, E.ALA.798   | N, E.VAL.786   | H, E.VAL.786    | 2.72 | 1.75 | 11.96 |
| RECEPTOR.PDB | OE2, E.GLU.62  | N, E.TYR.789   | H, E.TYR.789    | 2.72 | 1.72 | 7.90  |
| RECEPTOR.PDB | O, E.LEU.756   | NZ, E.LYS.796  | HZ3, E.LYS.796  | 2.75 | 1.79 | 13.40 |
| RECEPTOR.PDB | O, E.VAL.723   | N, E.VAL.799   | H, E.VAL.799    | 2.79 | 1.80 | 7.60  |
| RECEPTOR.PDB | O, E.VAL.782   | N, E.ILE.802   | H, E.ILE.802    | 2.85 | 1.88 | 13.33 |
| RECEPTOR.PDB | O, E.ALA.719   | N, E.LYS.803   | H, E.LYS.803    | 2.78 | 1.82 | 14.25 |
| RECEPTOR.PDB | O, E.ILE.780   | N, E.ILE.804   | H, E.ILE.804    | 2.73 | 1.72 | 4.35  |
| RECEPTOR.PDB | O, E.GLY.716   | N, E.ASP.805   | H, E.ASP.805    | 2.85 | 1.85 | 5.05  |
| RECEPTOR.PDB | OD2, E.ASP.805 | N, E.SER.808   | H, E.SER.808    | 2.82 | 1.84 | 9.38  |
| RECEPTOR.PDB | OD2, E.ASP.43  | ND2, E.ASN.812 | HD21, E.ASN.812 | 2.81 | 1.88 | 17.56 |
| RECEPTOR.PDB | O, E.ILE.810   | N, E.THR.814   | H, E.THR.814    | 2.80 | 1.80 | 7.77  |
| RECEPTOR.PDB | O, E.GLU.811   | N, E.LYS.815   | H, E.LYS.815    | 2.99 | 2.03 | 15.74 |
| RECEPTOR.PDB | OG, E.SER.833  | N, E.LYS.830   | H, E.LYS.830    | 2.93 | 2.06 | 25.00 |
| RECEPTOR.PDB | O, E.LYS.830   | OG, E.SER.833  | HG, E.SER.833   | 2.52 | 1.74 | 28.44 |
| RECEPTOR.PDB | O, E.MET.849   | N, E.ILE.840   | H, E.ILE.840    | 2.95 | 1.96 | 9.06  |
| RECEPTOR.PDB | O, E.ARG.861   | N, E.LEU.847   | H, E.LEU.847    | 2.83 | 1.83 | 6.32  |
| RECEPTOR.PDB | O, E.LEU.847   | N, E.GLY.860   | H, E.GLY.860    | 2.76 | 1.80 | 14.76 |
| RECEPTOR.PDB | O, E.GLY.845   | N, E.PHE.863   | H, E.PHE.863    | 3.00 | 2.04 | 14.62 |
| RECEPTOR.PDB | O, E.MET.870   | N, E.LEU.874   | H, E.LEU.874    | 2.96 | 2.04 | 20.42 |
| RECEPTOR.PDB | OD1, E.ASN.973 | OG, E.SER.878  | HG, E.SER.878   | 2.88 | 2.01 | 20.71 |
| RECEPTOR.PDB | O, E.PHE.970   | N, E.ALA.881   | H, E.ALA.881    | 2.90 | 2.00 | 21.52 |
| RECEPTOR.PDB | O, E.GLN.966   | N, E.SER.885   | H, E.SER.885    | 2.83 | 1.89 | 18.01 |
| RECEPTOR.PDB | O, E.THR.964   | N, E.ASP.887   | H, E.ASP.887    | 2.85 | 1.86 | 8.46  |
| RECEPTOR.PDB | O, E.GLN.900   | N, E.ALA.902   | H, E.ALA.902    | 2.97 | 2.15 | 29.30 |
| RECEPTOR.PDB | O, E.GLY.895   | NH2, E.ARG.905 | HH21, E.ARG.905 | 2.86 | 1.89 | 12.87 |
| RECEPTOR.PDB | O, E.ILE.915   | N, E.GLN.917   | H, E.GLN.917    | 2.96 | 2.13 | 28.49 |
| RECEPTOR.PDB | O, E.SER.890   | N, E.CYS.962   | H, E.CYS.962    | 2.88 | 1.91 | 13.45 |
| RECEPTOR.PDB | OG, E.SER.890  | OG1, E.THR.964 | HG1, E.THR.964  | 2.99 | 2.05 | 9.54  |
| RECEPTOR.PDB | O, E.SER.885   | N, E.GLN.966   | H, E.GLN.966    | 2.79 | 1.80 | 7.89  |
| RECEPTOR.PDB | O, E.ALA.881   | N, E.PHE.970   | H, E.PHE.970    | 2.92 | 1.96 | 15.05 |
| RECEPTOR.PDB | O, E.ASP.974   | NZ, E.LYS.976  | HZ2, E.LYS.976  | 2.99 | 2.15 | 27.62 |
| RECEPTOR.PDB | O, E.VAL.993   | N, E.PHE.978   | H, E.PHE.978    | 2.90 | 1.92 | 11.53 |
| RECEPTOR.PDB | O, E.ARG.989   | N, E.LEU.982   | H, E.LEU.982    | 2.95 | 1.97 | 12.16 |
| RECEPTOR.PDB | O, E.LEU.982   | N, E.ARG.989   | H, E.ARG.989    | 2.90 | 2.00 | 22.13 |
| RECEPTOR.PDB | O, E.PHE.978   | N, E.VAL.993   | H, E.VAL.993    | 2.94 | 1.96 | 11.10 |

---

Table 3: The side chain and main chain hydrogen bonding networks within the structural model represented in RECEPTOR.pdb. In this table, the residue naming scheme is **Chain ID\_residue name\_residue number**,  $\angle ADH$  represents the angle formed by acceptor (A), donor (D) and hydrogen (H) ( $\angle ADH$ ).

| PDB          | Acceptor (A)   | Donor (D)      | Hydrogen (H)    | D-A (Å) | H-A (Å) | $\angle ADH(^{\circ})$ |
|--------------|----------------|----------------|-----------------|---------|---------|------------------------|
| RECEPTOR.PDB | OH, E.TYR.761  | NZ, E.LYS.49   | HZ3, E.LYS.49   | 2.82    | 1.87    | 15.75                  |
| RECEPTOR.PDB | OE2, E.GLU.702 | NZ, E.LYS.63   | HZ3, E.LYS.63   | 2.55    | 1.67    | 23.67                  |
| RECEPTOR.PDB | OE1, E.GLU.702 | OH, E.TYR.64   | HH, E.TYR.64    | 2.58    | 1.69    | 17.39                  |
| RECEPTOR.PDB | OD1, E.ASN.196 | NH1, E.ARG.99  | HH11, E.ARG.99  | 2.68    | 1.70    | 11.75                  |
| RECEPTOR.PDB | OE1, E.GLU.103 | NZ, E.LYS.106  | HZ1, E.LYS.106  | 2.61    | 1.71    | 21.86                  |
| RECEPTOR.PDB | OD1, E.ASN.181 | NE2, E.HIS.111 | HE2, E.HIS.111  | 2.75    | 1.77    | 11.13                  |
| RECEPTOR.PDB | OD1, E.ASN.184 | NE, E.ARG.114  | HE, E.ARG.114   | 2.74    | 1.86    | 24.17                  |
| RECEPTOR.PDB | OE2, E.GLU.137 | NH1, E.ARG.135 | HH11, E.ARG.135 | 2.67    | 1.74    | 17.34                  |
| RECEPTOR.PDB | OH, E.TYR.124  | NH1, E.ARG.144 | HH12, E.ARG.144 | 2.85    | 1.98    | 24.37                  |
| RECEPTOR.PDB | OD2, E.ASP.152 | OH, E.TYR.161  | HH, E.TYR.161   | 2.55    | 1.75    | 27.20                  |
| RECEPTOR.PDB | OD2, E.ASP.234 | NE2, E.HIS.167 | HE2, E.HIS.167  | 2.81    | 1.81    | 5.73                   |
| RECEPTOR.PDB | OE2, E.GLU.182 | NE1, E.TRP.185 | HE1, E.TRP.185  | 2.71    | 1.84    | 24.46                  |
| RECEPTOR.PDB | OE2, E.GLU.191 | NH1, E.ARG.195 | HH11, E.ARG.195 | 2.53    | 1.55    | 9.17                   |
| RECEPTOR.PDB | OE1, E.GLN.206 | ND2, E.ASN.196 | HD21, E.ASN.196 | 2.66    | 1.78    | 22.72                  |
| RECEPTOR.PDB | OE1, E.GLU.182 | OG, E.SER.210  | HG, E.SER.210   | 2.55    | 1.66    | 17.72                  |
| RECEPTOR.PDB | OD1, E.ASP.190 | NH2, E.ARG.216 | HH21, E.ARG.216 | 2.67    | 1.79    | 23.24                  |
| RECEPTOR.PDB | OD1, E.ASP.237 | NE, E.ARG.239  | HE, E.ARG.239   | 2.70    | 1.73    | 13.07                  |
| RECEPTOR.PDB | OD2, E.ASP.237 | NH1, E.ARG.239 | HH11, E.ARG.239 | 2.87    | 1.92    | 16.36                  |
| RECEPTOR.PDB | OD1, E.ASP.287 | NZ, E.LYS.252  | HZ1, E.LYS.252  | 2.79    | 1.89    | 21.20                  |
| RECEPTOR.PDB | OE1, E.GLN.343 | ND2, E.ASN.290 | HD21, E.ASN.290 | 2.87    | 1.94    | 19.14                  |
| RECEPTOR.PDB | OD1, E.ASN.295 | NE2, E.GLN.299 | HE22, E.GLN.299 | 2.83    | 1.86    | 13.53                  |
| RECEPTOR.PDB | OD1, E.ASN.406 | ND2, E.ASN.377 | HD22, E.ASN.377 | 2.70    | 1.74    | 14.00                  |
| RECEPTOR.PDB | OD2, E.ASP.379 | NZ, E.LYS.381  | HZ1, E.LYS.381  | 2.56    | 1.75    | 29.39                  |
| RECEPTOR.PDB | OE2, E.GLU.412 | OH, E.TYR.410  | HH, E.TYR.410   | 2.72    | 1.80    | 13.73                  |
| RECEPTOR.PDB | OD1, E.ASP.171 | NH2, E.ARG.420 | HH22, E.ARG.420 | 2.75    | 1.83    | 19.88                  |
| RECEPTOR.PDB | OD2, E.ASP.237 | NE2, E.GLN.424 | HE22, E.GLN.424 | 2.98    | 1.97    | 5.44                   |
| RECEPTOR.PDB | OE2, E.GLU.105 | NZ, E.LYS.442  | HZ1, E.LYS.442  | 2.57    | 1.75    | 28.10                  |
| RECEPTOR.PDB | OD1, E.ASP.491 | OG1, E.THR.461 | HG1, E.THR.461  | 2.98    | 2.09    | 17.09                  |
| RECEPTOR.PDB | OG1, E.THR.470 | ND2, E.ASN.481 | HD22, E.ASN.481 | 2.91    | 1.92    | 7.62                   |
| RECEPTOR.PDB | OD2, E.ASP.285 | OH, E.TYR.520  | HH, E.TYR.520   | 2.54    | 1.72    | 25.96                  |
| RECEPTOR.PDB | OE1, E.GLU.546 | NE2, E.HIS.524 | HE2, E.HIS.524  | 2.74    | 1.76    | 12.33                  |
| RECEPTOR.PDB | OE1, E.GLU.536 | NZ, E.LYS.530  | HZ1, E.LYS.530  | 2.62    | 1.79    | 27.88                  |
| RECEPTOR.PDB | OE1, E.GLU.536 | OG, E.SER.534  | HG, E.SER.534   | 2.51    | 1.58    | 10.42                  |
| RECEPTOR.PDB | OE2, E.GLU.546 | NZ, E.LYS.552  | HZ1, E.LYS.552  | 2.67    | 1.71    | 15.03                  |
| RECEPTOR.PDB | OE1, E.GLU.578 | NZ, E.LYS.574  | HZ1, E.LYS.574  | 2.57    | 1.76    | 28.91                  |
| RECEPTOR.PDB | OE1, E.GLN.966 | NZ, E.LYS.574  | HZ3, E.LYS.574  | 2.63    | 1.76    | 24.11                  |
| RECEPTOR.PDB | OD2, E.ASP.577 | NE, E.ARG.579  | HE, E.ARG.579   | 2.56    | 1.59    | 12.49                  |
| RECEPTOR.PDB | OD1, E.ASP.757 | NH1, E.ARG.586 | HH11, E.ARG.586 | 2.66    | 1.76    | 21.42                  |
| RECEPTOR.PDB | OE2, E.GLU.71  | NZ, E.LYS.613  | HZ2, E.LYS.613  | 2.57    | 1.73    | 26.74                  |
| RECEPTOR.PDB | OE1, E.GLU.643 | NE2, E.GLN.705 | HE22, E.GLN.705 | 3.00    | 2.13    | 25.92                  |
| RECEPTOR.PDB | OD1, E.ASP.696 | OG1, E.THR.724 | HG1, E.THR.724  | 2.66    | 1.75    | 14.16                  |
| RECEPTOR.PDB | OE1, E.GLN.576 | NZ, E.LYS.753  | HZ1, E.LYS.753  | 2.60    | 1.70    | 21.45                  |
| RECEPTOR.PDB | OD2, E.ASP.582 | NE, E.ARG.754  | HE, E.ARG.754   | 2.70    | 1.71    | 8.99                   |
| RECEPTOR.PDB | OD1, E.ASP.582 | NH2, E.ARG.754 | HH21, E.ARG.754 | 2.64    | 1.67    | 13.76                  |
| RECEPTOR.PDB | OD2, E.ASP.43  | ND2, E.ASN.812 | HD21, E.ASN.812 | 2.81    | 1.88    | 17.56                  |
| RECEPTOR.PDB | OD1, E.ASN.973 | OG, E.SER.878  | HG, E.SER.878   | 2.88    | 2.01    | 20.71                  |
| RECEPTOR.PDB | OG, E.SER.890  | OG1, E.THR.964 | HG1, E.THR.964  | 2.99    | 2.05    | 9.54                   |

Table 4: The side chain hydrogen bonding networks within the structural model represented in RECEPTOR.pdb. In this table, the residue naming scheme is **Chain ID\_residue name\_residue number**,  $\angle ADH$  represents the angle formed by acceptor (A), donor (D) and hydrogen (H) ( $\angle ADH$ ).
