# Supplementary material for: Calcium Channel Trafficking Blocker Gabapentin Bound to the &alpha;2&delta;-1 Subunit of Voltage-Gated Calcium Channel: A Computational Structural Investigation
Source: Preprints.org preprint supplement (doi:10.20944/preprints202002.0127.v1), 2020-02-10
Supplement: Supplementary file 2 [file supplementary]

## Supporting Material

| PDB ID  | Residue A | Atom A | Residue B  | Atom B | Distance (Å) |
|---------|-----------|--------|------------|--------|--------------|
| COMPLEX | E_LYS_34  | NZ     | E_ASP_38   | OD2    | 3.406        |
| COMPLEX | E_ARG_76  | NH2    | E_GLU_80   | OE2    | 3.282        |
| COMPLEX | E_LYS_88  | NZ     | E_ASP_85   | OD1    | 3.561        |
| COMPLEX | E_ARG_93  | NH1    | E_ASP_496  | OD2    | 3.690        |
| COMPLEX | E_ARG_93  | NH2    | E_ASP_496  | OD2    | 3.173        |
| COMPLEX | E_LYS_106 | NZ     | E_GLU_103  | OE2    | 2.937        |
| COMPLEX | E_LYS_128 | NZ     | E_ASP_234  | OD1    | 2.943        |
| COMPLEX | E_LYS_128 | NZ     | E_ASP_234  | OD2    | 3.046        |
| COMPLEX | E_ARG_135 | NH1    | E_ASP_130  | OD2    | 3.486        |
| COMPLEX | E_ARG_135 | NH2    | E_ASP_130  | OD2    | 3.070        |
| COMPLEX | E_ARG_144 | NH2    | E_ASP_129  | OD2    | 3.183        |
| COMPLEX | E_HIS_167 | NE2    | E_ASP_234  | OD2    | 2.828        |
| COMPLEX | E_ARG_195 | NH1    | E_GLU_191  | OE2    | 3.248        |
| COMPLEX | E_ARG_197 | NH1    | E_ASP_152  | OD2    | 3.449        |
| COMPLEX | E_ARG_216 | NH2    | E_ASP_190  | OD1    | 2.962        |
| COMPLEX | E_ARG_216 | NH2    | E_ASP_190  | OD2    | 2.998        |
| COMPLEX | E_ARG_228 | NH1    | E_GLU_137  | OE2    | 2.973        |
| COMPLEX | E_LYS_232 | NZ     | E_ASP_225  | OD2    | 2.917        |
| COMPLEX | E_ARG_240 | NH1    | E_GLU_278  | OE1    | 2.961        |
| COMPLEX | E_ARG_240 | NH2    | E_GLU_278  | OE1    | 2.876        |
| COMPLEX | E_ARG_240 | NH2    | E_GLU_278  | OE2    | 3.881        |
| COMPLEX | E_ARG_240 | NH2    | E_GLU_281  | OE1    | 3.033        |
| COMPLEX | E_LYS_252 | NZ     | E_ASP_287  | OD1    | 2.978        |
| COMPLEX | E_LYS_252 | NZ     | E_ASP_287  | OD2    | 3.195        |
| COMPLEX | E_LYS_316 | NZ     | E_ASP_320  | OD2    | 3.051        |
| COMPLEX | E_LYS_319 | NZ     | E_GLU_281  | OE2    | 2.856        |
| COMPLEX | E_LYS_334 | NZ     | E_GLU_371  | OE1    | 2.936        |
| COMPLEX | E_ARG_351 | NH2    | E_ASP_253  | OD2    | 2.981        |
| COMPLEX | E_LYS_381 | NZ     | E_ASP_379  | OD2    | 2.905        |
| COMPLEX | E_ARG_383 | NH1    | E_GLU_1054 | OE1    | 2.853        |
| COMPLEX | E_ARG_383 | NH1    | E_GLU_1054 | OE2    | 3.495        |
| COMPLEX | E_ARG_383 | NH2    | E_GLU_1054 | OE1    | 3.460        |
| COMPLEX | E_ARG_383 | NH2    | E_GLU_1054 | OE2    | 2.828        |
| COMPLEX | E_ARG_396 | NH1    | E_GLU_412  | OE2    | 2.893        |
| COMPLEX | E_ARG_420 | NH1    | E_ASP_171  | OD2    | 3.640        |
| COMPLEX | E_ARG_432 | NH1    | E_GLU_1054 | OE1    | 3.040        |
| COMPLEX | E_LYS_442 | NZ     | E_GLU_105  | OE1    | 2.864        |
| COMPLEX | E_LYS_442 | NZ     | E_GLU_105  | OE2    | 3.135        |
| COMPLEX | E_LYS_442 | NZ     | E_ASP_439  | OD1    | 3.264        |
| COMPLEX | E_LYS_476 | NZ     | E_GLU_474  | OE1    | 3.939        |
| COMPLEX | E_ARG_499 | NH1    | E_ASP_496  | OD1    | 3.784        |
| COMPLEX | E_ARG_503 | NH1    | E_GLU_748  | OE2    | 3.059        |
| COMPLEX | E_ARG_503 | NH2    | E_GLU_748  | OE2    | 2.869        |
| COMPLEX | E_HIS_524 | NE2    | E_GLU_546  | OE2    | 2.888        |
| COMPLEX | E_LYS_552 | NZ     | E_GLU_546  | OE1    | 2.881        |
| COMPLEX | E_ARG_556 | NH2    | E_ASP_541  | OD1    | 2.849        |
| COMPLEX | E_ARG_556 | NH2    | E_ASP_541  | OD2    | 3.687        |
| COMPLEX | E_LYS_558 | NZ     | E_GLU_563  | OE1    | 3.095        |
| COMPLEX | E_LYS_567 | NZ     | E_GLU_554  | OE1    | 2.965        |
| COMPLEX | E_LYS_567 | NZ     | E_GLU_554  | OE2    | 3.258        |
| COMPLEX | E_ARG_579 | NH2    | E_ASP_577  | OD2    | 3.280        |
| COMPLEX | E_ARG_586 | NH1    | E_ASP_757  | OD1    | 2.992        |
| COMPLEX | E_ARG_586 | NH1    | E_ASP_757  | OD2    | 3.188        |
| COMPLEX | E_ARG_586 | NH2    | E_ASP_757  | OD1    | 2.880        |
| COMPLEX | E_LYS_615 | NZ     | E_ASP_66   | OD1    | 2.903        |
| COMPLEX | E_LYS_626 | NZ     | E_GLU_618  | OE1    | 2.874        |
| COMPLEX | E_LYS_627 | NZ     | E_GLU_634  | OE2    | 2.912        |

|         |            |     |            |     |       |
|---------|------------|-----|------------|-----|-------|
| COMPLEX | E_LYS.629  | NZ  | E_ASP.632  | OD1 | 3.949 |
| COMPLEX | E_LYS.631  | NZ  | E_GLU.643  | OE2 | 2.891 |
| COMPLEX | E_ARG.677  | NH1 | E_GLU.673  | OE1 | 3.745 |
| COMPLEX | E_ARG.677  | NH1 | E_GLU.673  | OE2 | 3.823 |
| COMPLEX | E_ARG.677  | NH2 | E_GLU.673  | OE1 | 3.292 |
| COMPLEX | E_ARG.692  | NH1 | E_ASP.696  | OD1 | 3.071 |
| COMPLEX | E_ARG.754  | NH1 | E_ASP.843  | OD1 | 2.918 |
| COMPLEX | E_ARG.754  | NH2 | E_ASP.582  | OD1 | 2.830 |
| COMPLEX | E_ARG.754  | NH2 | E_ASP.582  | OD2 | 3.691 |
| COMPLEX | E_ARG.754  | NH2 | E_ASP.843  | OD1 | 3.006 |
| COMPLEX | E_ARG.754  | NH2 | E_ASP.843  | OD2 | 2.886 |
| COMPLEX | E_LYS.815  | NZ  | E_GLU.811  | OE1 | 3.704 |
| COMPLEX | E_ARG.819  | NH1 | E_GLU.42   | OE1 | 3.010 |
| COMPLEX | E_ARG.831  | NH1 | E_ASP.853  | OD1 | 3.160 |
| COMPLEX | E_ARG.831  | NH1 | E_ASP.853  | OD2 | 3.071 |
| COMPLEX | E_HIS.852  | ND1 | E_ASP.837  | OD1 | 2.865 |
| COMPLEX | E_HIS.852  | ND1 | E_ASP.837  | OD2 | 3.063 |
| COMPLEX | E_HIS.852  | NE2 | E_ASP.834  | OD1 | 3.522 |
| COMPLEX | E_ARG.861  | NH2 | E_GLU.865  | OE1 | 3.579 |
| COMPLEX | E_LYS.976  | NZ  | E_ASP.38   | OD1 | 3.624 |
| COMPLEX | E_ARG.989  | NH1 | E_ASP.867  | OD2 | 3.373 |
| COMPLEX | E_ARG.989  | NH2 | E_ASP.867  | OD1 | 3.813 |
| COMPLEX | E_ARG.989  | NH2 | E_ASP.867  | OD2 | 2.899 |
| COMPLEX | E_LYS.1036 | NZ  | E_ASP.1033 | OD1 | 3.076 |
| COMPLEX | E_ARG.1039 | NH1 | E_ASP.541  | OD1 | 3.692 |
| COMPLEX | E_ARG.1039 | NH1 | E_ASP.544  | OD1 | 3.478 |
| COMPLEX | E_ARG.1039 | NH1 | E_ASP.544  | OD2 | 3.638 |
| COMPLEX | E_ARG.1039 | NH2 | E_ASP.544  | OD1 | 2.956 |
| COMPLEX | E_LYS.1042 | NZ  | E_ASP.561  | OD1 | 3.153 |

Table 1: Salt bridging networks within the structural model represented in COMPLEX.pdb.

In this table, the residue naming scheme is **Chain ID\_residue name\_residue number**.

| Count | Residue A | Residue B |
|-------|-----------|-----------|
| 4     | ARG383    | GLU1054   |
| 3     | ARG1039   | ASP544    |
| 3     | ARG754    | ASP843    |
| 3     | ARG677    | GLU673    |
| 3     | ARG240    | GLU278    |
| 3     | ARG586    | ASP757    |
| 3     | ARG989    | ASP867    |
| 2     | LYS128    | ASP234    |
| 2     | ARG93     | ASP496    |
| 2     | ARG831    | ASP853    |
| 2     | HIS852    | ASP837    |
| 2     | ARG754    | ASP582    |
| 2     | LYS252    | ASP287    |
| 2     | ARG503    | GLU748    |
| 2     | LYS567    | GLU554    |
| 2     | ARG135    | ASP130    |
| 2     | LYS442    | GLU105    |
| 2     | ARG556    | ASP541    |
| 2     | ARG216    | ASP190    |
| 1     | ARG396    | GLU412    |
| 1     | LYS334    | GLU371    |
| 1     | LYS976    | ASP38     |
| 1     | LYS319    | GLU281    |
| 1     | ARG228    | GLU137    |
| 1     | LYS1036   | ASP1033   |
| 1     | LYS381    | ASP379    |
| 1     | LYS88     | ASP85     |
| 1     | LYS558    | GLU563    |
| 1     | LYS626    | GLU618    |
| 1     | LYS627    | GLU634    |
| 1     | ARG197    | ASP152    |
| 1     | ARG432    | GLU1054   |
| 1     | LYS629    | ASP632    |
| 1     | ARG819    | GLU42     |
| 1     | LYS442    | ASP439    |
| 1     | LYS1042   | ASP561    |
| 1     | LYS316    | ASP320    |
| 1     | LYS476    | GLU474    |
| 1     | ARG195    | GLU191    |
| 1     | LYS552    | GLU546    |
| 1     | LYS631    | GLU643    |
| 1     | ARG499    | ASP496    |
| 1     | ARG1039   | ASP541    |
| 1     | ARG861    | GLU865    |
| 1     | ARG351    | ASP253    |
| 1     | HIS852    | ASP834    |
| 1     | ARG579    | ASP577    |
| 1     | ARG144    | ASP129    |
| 1     | LYS615    | ASP66     |
| 1     | ARG76     | GLU80     |
| 1     | ARG420    | ASP171    |
| 1     | LYS232    | ASP225    |
| 1     | ARG692    | ASP696    |
| 1     | LYS106    | GLU103    |
| 1     | LYS815    | GLU811    |
| 1     | LYS34     | ASP38     |
| 1     | HIS167    | ASP234    |

|   |        |        |
|---|--------|--------|
| 1 | HIS524 | GLU546 |
| 1 | ARG240 | GLU281 |

Table 2: Counting of side chain salt bridging networks within the structural model represented in COMPLEX.pdb. In this table, the residue naming scheme is **Chain ID\_residue name\_residue number**.

| PDB         | Acceptor (A)   | Donor (D)      | Hydrogen (H)   | D-A (Å) | H-A (Å) | $\angle ADH(^{\circ})$ |
|-------------|----------------|----------------|----------------|---------|---------|------------------------|
| COMPLEX.PDB | OG, E.SER.29   | OG1, E.THR.32  | HG1, E.THR.32  | 2.72    | 1.76    | 6.24                   |
| COMPLEX.PDB | O, E.SER.29    | N, E.ILE.33    | H, E.ILE.33    | 2.98    | 1.99    | 11.71                  |
| COMPLEX.PDB | O, E.PRO.30    | N, E.LYS.34    | H, E.LYS.34    | 2.87    | 1.92    | 16.05                  |
| COMPLEX.PDB | O, E.VAL.31    | N, E.SER.35    | H, E.SER.35    | 2.95    | 1.95    | 8.95                   |
| COMPLEX.PDB | O, E.THR.32    | N, E.TRP.36    | H, E.TRP.36    | 2.94    | 2.02    | 20.41                  |
| COMPLEX.PDB | O, E.ILE.33    | N, E.VAL.37    | H, E.VAL.37    | 2.83    | 1.84    | 9.15                   |
| COMPLEX.PDB | O, E.LYS.34    | N, E.ASP.38    | H, E.ASP.38    | 2.90    | 1.94    | 15.40                  |
| COMPLEX.PDB | O, E.VAL.37    | N, E.GLN.41    | H, E.GLN.41    | 2.82    | 1.84    | 12.90                  |
| COMPLEX.PDB | O, E.MET.997   | NE2, E.GLN.41  | 2HE2, E.GLN.41 | 2.88    | 1.96    | 20.18                  |
| COMPLEX.PDB | O, E.ASP.38    | N, E.GLU.42    | H, E.GLU.42    | 2.90    | 1.90    | 6.43                   |
| COMPLEX.PDB | O, E.GLN.41    | N, E.VAL.45    | H, E.VAL.45    | 2.93    | 1.93    | 6.80                   |
| COMPLEX.PDB | O, E.GLU.42    | N, E.THR.46    | H, E.THR.46    | 2.92    | 1.94    | 12.04                  |
| COMPLEX.PDB | O, E.GLU.42    | OG1, E.THR.46  | HG1, E.THR.46  | 2.70    | 1.75    | 11.54                  |
| COMPLEX.PDB | O, E.LEU.44    | N, E.ALA.48    | H, E.ALA.48    | 2.91    | 1.92    | 10.10                  |
| COMPLEX.PDB | O, E.VAL.45    | N, E.LYS.49    | H, E.LYS.49    | 2.91    | 1.91    | 10.32                  |
| COMPLEX.PDB | O, E.THR.46    | N, E.THR.50    | H, E.THR.50    | 2.90    | 1.90    | 7.94                   |
| COMPLEX.PDB | O, E.ALA.48    | OG, E.SER.52   | HG, E.SER.52   | 2.67    | 1.70    | 3.58                   |
| COMPLEX.PDB | O, E.GLY.53    | N, E.LEU.57    | H, E.LEU.57    | 2.99    | 2.00    | 11.30                  |
| COMPLEX.PDB | O, E.THR.55    | N, E.ASP.59    | H, E.ASP.59    | 2.81    | 1.86    | 15.65                  |
| COMPLEX.PDB | O, E.ALA.58    | N, E.GLU.62    | H, E.GLU.62    | 2.97    | 1.95    | 3.78                   |
| COMPLEX.PDB | O, E.ASP.59    | N, E.LYS.63    | H, E.LYS.63    | 2.81    | 1.98    | 28.81                  |
| COMPLEX.PDB | OE1, E.GLU.702 | OH, E.TYR.64   | HH, E.TYR.64   | 2.63    | 1.66    | 4.27                   |
| COMPLEX.PDB | O, E.GLU.62    | NE2, E.GLN.65  | 2HE2, E.GLN.65 | 2.89    | 1.89    | 7.15                   |
| COMPLEX.PDB | O, E.TYR.61    | OH, E.TYR.68   | HH, E.TYR.68   | 2.64    | 1.68    | 4.45                   |
| COMPLEX.PDB | O, E.LYS.613   | N, E.THR.69    | H, E.THR.69    | 2.87    | 1.87    | 10.16                  |
| COMPLEX.PDB | O, E.TYR.611   | N, E.GLU.71    | H, E.GLU.71    | 2.94    | 1.94    | 8.57                   |
| COMPLEX.PDB | O, E.PHE.609   | N, E.ASN.73    | H, E.ASN.73    | 2.80    | 1.80    | 9.55                   |
| COMPLEX.PDB | O, E.THR.505   | ND2, E.ASN.73  | 1HD2, E.ASN.73 | 2.99    | 1.98    | 2.88                   |
| COMPLEX.PDB | O, E.SER.608   | ND2, E.ASN.73  | 2HD2, E.ASN.73 | 2.95    | 1.96    | 7.57                   |
| COMPLEX.PDB | O, E.ASN.74    | N, E.LEU.78    | H, E.LEU.78    | 2.90    | 1.92    | 11.61                  |
| COMPLEX.PDB | O, E.ALA.75    | N, E.VAL.79    | H, E.VAL.79    | 2.90    | 1.90    | 9.25                   |
| COMPLEX.PDB | O, E.GLN.77    | N, E.ILE.81    | H, E.ILE.81    | 2.99    | 2.00    | 10.15                  |
| COMPLEX.PDB | O, E.VAL.79    | N, E.ALA.83    | H, E.ALA.83    | 2.81    | 1.84    | 13.88                  |
| COMPLEX.PDB | O, E.ILE.81    | N, E.ASP.85    | H, E.ASP.85    | 2.89    | 1.93    | 15.53                  |
| COMPLEX.PDB | O, E.ALA.82    | N, E.ILE.86    | H, E.ILE.86    | 2.93    | 1.94    | 11.58                  |
| COMPLEX.PDB | O, E.ALA.83    | N, E.GLU.87    | H, E.GLU.87    | 2.87    | 1.91    | 15.42                  |
| COMPLEX.PDB | O, E.ARG.84    | N, E.LYS.88    | H, E.LYS.88    | 2.93    | 1.97    | 15.42                  |
| COMPLEX.PDB | O, E.ASP.85    | N, E.LEU.89    | H, E.LEU.89    | 2.96    | 2.02    | 17.81                  |
| COMPLEX.PDB | O, E.GLU.87    | N, E.SER.91    | H, E.SER.91    | 2.84    | 1.86    | 13.38                  |
| COMPLEX.PDB | O, E.ASP.491   | NH2, E.ARG.93  | 1HH2, E.ARG.93 | 2.89    | 1.92    | 15.11                  |
| COMPLEX.PDB | O, E.LEU.90    | N, E.SER.94    | H, E.SER.94    | 2.84    | 1.88    | 15.66                  |
| COMPLEX.PDB | O, E.LEU.90    | OG, E.SER.94   | HG, E.SER.94   | 2.86    | 1.90    | 5.63                   |
| COMPLEX.PDB | O, E.SER.91    | N, E.LYS.95    | H, E.LYS.95    | 2.89    | 1.97    | 20.98                  |
| COMPLEX.PDB | O, E.LEU.97    | N, E.ALA.101   | H, E.ALA.101   | 2.89    | 1.90    | 11.14                  |
| COMPLEX.PDB | O, E.ARG.99    | N, E.GLU.103   | H, E.GLU.103   | 2.96    | 1.99    | 14.24                  |
| COMPLEX.PDB | O, E.LEU.100   | N, E.ALA.104   | H, E.ALA.104   | 2.91    | 1.94    | 14.04                  |
| COMPLEX.PDB | OE2, E.GLU.103 | NZ, E.LYS.106  | 1HZ, E.LYS.106 | 2.94    | 1.96    | 12.59                  |
| COMPLEX.PDB | O, E.GLU.103   | N, E.VAL.107   | H, E.VAL.107   | 2.87    | 1.88    | 11.34                  |
| COMPLEX.PDB | O, E.ALA.104   | N, E.GLN.108   | H, E.GLN.108   | 2.95    | 1.96    | 9.59                   |
| COMPLEX.PDB | O, E.GLU.105   | N, E.ALA.109   | H, E.ALA.109   | 2.96    | 2.01    | 16.14                  |
| COMPLEX.PDB | O, E.GLN.108   | N, E.HIS.111   | H, E.HIS.111   | 3.00    | 2.03    | 14.52                  |
| COMPLEX.PDB | OD1, E.ASN.184 | NE2, E.HIS.111 | HE2, E.HIS.111 | 2.88    | 1.88    | 10.04                  |
| COMPLEX.PDB | OE2, E.GLU.115 | NE1, E.TRP.113 | HE1, E.TRP.113 | 2.99    | 2.09    | 21.85                  |
| COMPLEX.PDB | OD2, E.ASP.116 | OG, E.SER.119  | HG, E.SER.119  | 2.66    | 1.71    | 9.60                   |
| COMPLEX.PDB | O, E.PHE.117   | N, E.ASN.120   | H, E.ASN.120   | 2.99    | 2.06    | 18.33                  |
| COMPLEX.PDB | O, E.GLY.141   | N, E.VAL.122   | H, E.VAL.122   | 2.90    | 1.88    | 3.47                   |
| COMPLEX.PDB | O, E.GLN.143   | N, E.TYR.124   | H, E.TYR.124   | 2.94    | 1.94    | 9.51                   |

|             |                |                |                 |      |      |       |
|-------------|----------------|----------------|-----------------|------|------|-------|
| COMPLEX.PDB | O, E_VAL.166   | N, E_ALA.127   | H, E_ALA.127    | 2.82 | 1.81 | 5.33  |
| COMPLEX.PDB | O, E_ILE.168   | NZ, E_LYS.128  | 2HZ, E_LYS.128  | 2.87 | 1.98 | 22.93 |
| COMPLEX.PDB | OD1, E_ASP.234 | NZ, E_LYS.128  | 3HZ, E_LYS.128  | 2.94 | 1.95 | 10.09 |
| COMPLEX.PDB | OD1, E_ASP.132 | N, E_GLU.134   | H, E_GLU.134    | 2.99 | 2.01 | 12.34 |
| COMPLEX.PDB | O, E_VAL.122   | N, E_GLN.143   | H, E_GLN.143    | 2.90 | 1.95 | 16.43 |
| COMPLEX.PDB | OD2, E_ASP.129 | NE, E_ARG.144  | HE, E_ARG.144   | 2.79 | 1.81 | 12.37 |
| COMPLEX.PDB | O, E_TYR.124   | N, E_ILE.145   | H, E_ILE.145    | 2.87 | 1.87 | 9.22  |
| COMPLEX.PDB | O, E_ALA.153   | N, E_PHE.155   | H, E_PHE.155    | 2.88 | 1.97 | 21.04 |
| COMPLEX.PDB | O, E_PRO.222   | NH2, E_ARG.157 | 1HH2, E_ARG.157 | 2.99 | 2.09 | 21.27 |
| COMPLEX.PDB | O, E_ILE.150   | N, E_ILE.159   | H, E_ILE.159    | 2.80 | 1.81 | 10.78 |
| COMPLEX.PDB | O, E_ALA.220   | N, E_SER.160   | H, E_SER.160    | 2.81 | 1.87 | 17.92 |
| COMPLEX.PDB | O, E_ALA.164   | ND1, E_HIS.163 | HD1, E_HIS.163  | 2.95 | 1.96 | 10.60 |
| COMPLEX.PDB | OD2, E_ASP.190 | N, E_ALA.164   | H, E_ALA.164    | 2.89 | 1.87 | 1.22  |
| COMPLEX.PDB | O, E_TYR.217   | N, E_ALA.165   | H, E_ALA.165    | 2.83 | 1.83 | 8.61  |
| COMPLEX.PDB | O, E_TYR.125   | N, E_VAL.166   | H, E_VAL.166    | 2.85 | 1.84 | 4.85  |
| COMPLEX.PDB | O, E_ALA.215   | N, E_HIS.167   | H, E_HIS.167    | 2.88 | 1.88 | 9.81  |
| COMPLEX.PDB | OD2, E_ASP.234 | NE2, E_HIS.167 | HE2, E_HIS.167  | 2.83 | 1.86 | 15.02 |
| COMPLEX.PDB | O, E_SER.176   | N, E_LEU.180   | H, E_LEU.180    | 2.87 | 1.87 | 6.50  |
| COMPLEX.PDB | O, E_THR.177   | N, E_ASN.181   | H, E_ASN.181    | 2.90 | 1.93 | 13.02 |
| COMPLEX.PDB | O, E_ARG.114   | ND2, E_ASN.181 | 1HD2, E_ASN.181 | 2.93 | 1.99 | 18.40 |
| COMPLEX.PDB | O, E_VAL.179   | N, E_LEU.183   | H, E_LEU.183    | 2.86 | 1.86 | 6.86  |
| COMPLEX.PDB | O, E_LEU.180   | N, E_ASN.184   | H, E_ASN.184    | 2.93 | 1.99 | 18.73 |
| COMPLEX.PDB | OE2, E_GLU.182 | NE1, E_TRP.185 | HE1, E_TRP.185  | 2.92 | 1.92 | 8.41  |
| COMPLEX.PDB | O, E_GLU.182   | N, E_THR.186   | H, E_THR.186    | 2.89 | 1.89 | 8.76  |
| COMPLEX.PDB | O, E_GLU.182   | OG1, E_THR.186 | HG1, E_THR.186  | 2.66 | 1.70 | 3.98  |
| COMPLEX.PDB | O, E_LEU.189   | N, E_PHE.193   | H, E_PHE.193    | 2.87 | 1.89 | 12.18 |
| COMPLEX.PDB | O, E_GLU.191   | N, E_ARG.195   | H, E_ARG.195    | 2.96 | 1.97 | 11.10 |
| COMPLEX.PDB | OE1, E_GLN.206 | ND2, E_ASN.196 | 2HD2, E_ASN.196 | 2.92 | 1.94 | 11.76 |
| COMPLEX.PDB | O, E_LYS.194   | N, E_ASP.198   | H, E_ASP.198    | 2.81 | 1.86 | 16.26 |
| COMPLEX.PDB | OD1, E_ASP.200 | N, E_THR.202   | H, E_THR.202    | 2.95 | 2.00 | 17.00 |
| COMPLEX.PDB | OD1, E_ASP.200 | OG1, E_THR.202 | HG1, E_THR.202  | 2.72 | 1.76 | 6.38  |
| COMPLEX.PDB | O, E_TYR.218   | N, E_GLN.206   | H, E_GLN.206    | 2.96 | 2.07 | 23.24 |
| COMPLEX.PDB | O, E_PHE.193   | NE2, E_GLN.206 | 1HE2, E_GLN.206 | 2.97 | 1.99 | 10.64 |
| COMPLEX.PDB | O, E_GLY.489   | N, E_VAL.207   | H, E_VAL.207    | 2.81 | 1.87 | 18.28 |
| COMPLEX.PDB | O, E_ARG.216   | N, E_PHE.208   | H, E_PHE.208    | 2.90 | 1.91 | 10.14 |
| COMPLEX.PDB | O, E_VAL.487   | N, E_GLY.209   | H, E_GLY.209    | 2.86 | 1.85 | 8.10  |
| COMPLEX.PDB | O, E_LEU.214   | N, E_SER.210   | H, E_SER.210    | 2.78 | 1.80 | 12.47 |
| COMPLEX.PDB | OE1, E_GLU.182 | OG, E_SER.210  | HG, E_SER.210   | 2.66 | 1.69 | 4.87  |
| COMPLEX.PDB | O, E_LEU.485   | N, E_ALA.211   | H, E_ALA.211    | 2.82 | 1.81 | 5.49  |
| COMPLEX.PDB | O, E_SER.210   | N, E_GLY.213   | H, E_GLY.213    | 2.97 | 1.99 | 12.83 |
| COMPLEX.PDB | O, E_HIS.167   | N, E_ALA.215   | H, E_ALA.215    | 2.93 | 1.94 | 10.87 |
| COMPLEX.PDB | O, E_PHE.208   | N, E_ARG.216   | H, E_ARG.216    | 2.86 | 1.87 | 11.52 |
| COMPLEX.PDB | OD1, E_ASP.190 | NE, E_ARG.216  | HE, E_ARG.216   | 2.91 | 2.02 | 23.66 |
| COMPLEX.PDB | OD2, E_ASP.190 | NH2, E_ARG.216 | 1HH2, E_ARG.216 | 3.00 | 2.07 | 19.79 |
| COMPLEX.PDB | O, E_ALA.165   | N, E_TYR.217   | H, E_TYR.217    | 2.87 | 1.89 | 12.53 |
| COMPLEX.PDB | O, E_GLN.206   | N, E_TYR.218   | H, E_TYR.218    | 2.80 | 1.82 | 12.63 |
| COMPLEX.PDB | O, E_TYR.161   | OH, E_TYR.218  | HH, E_TYR.218   | 2.74 | 1.78 | 6.58  |
| COMPLEX.PDB | O, E_SER.160   | N, E_ALA.220   | H, E_ALA.220    | 2.95 | 2.06 | 23.78 |
| COMPLEX.PDB | O, E_PRO.222   | OG, E_SER.221  | HG, E_SER.221   | 2.90 | 1.93 | 1.12  |
| COMPLEX.PDB | OD1, E_ASP.130 | OG1, E_THR.229 | HG1, E_THR.229  | 2.76 | 1.81 | 9.95  |
| COMPLEX.PDB | OD2, E_ASP.225 | NZ, E_LYS.232  | 2HZ, E_LYS.232  | 2.92 | 1.96 | 15.31 |
| COMPLEX.PDB | OD1, E_ASP.237 | N, E_ARG.239   | H, E_ARG.239    | 2.92 | 1.95 | 14.36 |
| COMPLEX.PDB | O, E_ALA.211   | NH1, E_ARG.239 | 1HH1, E_ARG.239 | 2.92 | 1.92 | 7.26  |
| COMPLEX.PDB | OE1, E_GLU.278 | NH1, E_ARG.240 | 2HH1, E_ARG.240 | 2.96 | 2.06 | 22.46 |
| COMPLEX.PDB | OE1, E_GLU.278 | NH2, E_ARG.240 | 2HH2, E_ARG.240 | 2.88 | 1.94 | 17.95 |
| COMPLEX.PDB | O, E_VAL.238   | N, E_ARG.241   | H, E_ARG.241    | 2.97 | 2.00 | 13.82 |
| COMPLEX.PDB | O, E_PRO.242   | N, E_GLN.246   | H, E_GLN.246    | 2.91 | 1.95 | 15.17 |
| COMPLEX.PDB | OE1, E_GLN.445 | NE2, E_GLN.246 | 2HE2, E_GLN.246 | 2.93 | 1.98 | 15.85 |

|             |                |                |                 |      |      |       |
|-------------|----------------|----------------|-----------------|------|------|-------|
| COMPLEX.PDB | O, E.TYR.244   | N, E.ALA.248   | H, E.ALA.248    | 2.82 | 1.94 | 24.44 |
| COMPLEX.PDB | OD1, E.ASP.287 | N, E.LYS.252   | H, E.LYS.252    | 2.89 | 1.95 | 18.35 |
| COMPLEX.PDB | OD1, E.ASP.287 | NZ, E.LYS.252  | 3HZ, E.LYS.252  | 2.98 | 1.98 | 8.55  |
| COMPLEX.PDB | O, E.ASN.355   | N, E.ASP.253   | H, E.ASP.253    | 2.84 | 1.82 | 3.42  |
| COMPLEX.PDB | O, E.PHE.288   | N, E.MET.254   | H, E.MET.254    | 2.83 | 1.83 | 8.82  |
| COMPLEX.PDB | O, E.MET.359   | N, E.LEU.257   | H, E.LEU.257    | 2.81 | 1.83 | 12.48 |
| COMPLEX.PDB | OD1, E.ASP.259 | N, E.SER.261   | H, E.SER.261    | 2.96 | 2.00 | 16.17 |
| COMPLEX.PDB | OD1, E.ASP.259 | OG, E.SER.261  | HG, E.SER.261   | 2.70 | 1.76 | 11.26 |
| COMPLEX.PDB | O, E.GLY.329   | N, E.GLY.262   | H, E.GLY.262    | 2.86 | 1.86 | 7.33  |
| COMPLEX.PDB | OD2, E.ASP.363 | OG, E.SER.263  | HG, E.SER.263   | 2.97 | 2.07 | 18.12 |
| COMPLEX.PDB | O, E.GLY.262   | OG, E.SER.265  | HG, E.SER.265   | 2.89 | 1.95 | 11.90 |
| COMPLEX.PDB | O, E.LEU.267   | N, E.LEU.271   | H, E.LEU.271    | 2.96 | 1.96 | 8.43  |
| COMPLEX.PDB | O, E.THR.268   | N, E.ILE.272   | H, E.ILE.272    | 2.84 | 1.86 | 13.90 |
| COMPLEX.PDB | O, E.LEU.271   | N, E.SER.275   | H, E.SER.275    | 2.83 | 1.88 | 16.12 |
| COMPLEX.PDB | O, E.LEU.271   | OG, E.SER.275  | HG, E.SER.275   | 2.76 | 1.80 | 5.08  |
| COMPLEX.PDB | O, E.ILE.272   | N, E.VAL.276   | H, E.VAL.276    | 2.88 | 1.90 | 12.09 |
| COMPLEX.PDB | O, E.ARG.273   | OG, E.SER.277  | HG, E.SER.277   | 2.82 | 1.86 | 5.63  |
| COMPLEX.PDB | O, E.THR.274   | N, E.GLU.278   | H, E.GLU.278    | 2.94 | 1.97 | 13.12 |
| COMPLEX.PDB | O, E.VAL.276   | N, E.LEU.280   | H, E.LEU.280    | 2.97 | 2.01 | 15.56 |
| COMPLEX.PDB | OE1, E.GLN.424 | OG1, E.THR.282 | HG1, E.THR.282  | 2.98 | 2.03 | 7.37  |
| COMPLEX.PDB | OD2, E.ASP.287 | N, E.SER.284   | H, E.SER.284    | 2.87 | 1.94 | 19.09 |
| COMPLEX.PDB | OD2, E.ASP.287 | OG, E.SER.284  | HG, E.SER.284   | 2.69 | 1.72 | 5.06  |
| COMPLEX.PDB | O, E.LYS.252   | N, E.PHE.288   | H, E.PHE.288    | 2.91 | 1.92 | 9.47  |
| COMPLEX.PDB | O, E.VAL.308   | N, E.VAL.289   | H, E.VAL.289    | 2.82 | 1.83 | 10.02 |
| COMPLEX.PDB | OD1, E.ASN.290 | N, E.VAL.291   | H, E.VAL.291    | 3.00 | 2.17 | 29.08 |
| COMPLEX.PDB | O, E.ILE.256   | N, E.ALA.292   | H, E.ALA.292    | 2.94 | 1.94 | 10.19 |
| COMPLEX.PDB | O, E.GLN.299   | N, E.SER.293   | H, E.SER.293    | 2.82 | 1.81 | 3.96  |
| COMPLEX.PDB | O, E.ASN.297   | N, E.ASN.295   | H, E.ASN.295    | 2.86 | 1.84 | 3.40  |
| COMPLEX.PDB | O, E.LYS.328   | ND2, E.ASN.295 | 2HD2, E.ASN.295 | 2.88 | 1.89 | 9.42  |
| COMPLEX.PDB | O, E.ASN.295   | OG, E.SER.296  | HG, E.SER.296   | 2.68 | 1.77 | 15.51 |
| COMPLEX.PDB | O, E.SER.293   | N, E.GLN.299   | H, E.GLN.299    | 2.89 | 1.89 | 7.56  |
| COMPLEX.PDB | O, E.VAL.291   | N, E.VAL.301   | H, E.VAL.301    | 2.97 | 1.97 | 8.91  |
| COMPLEX.PDB | O, E.LEU.307   | ND1, E.HIS.306 | HD1, E.HIS.306  | 2.90 | 1.95 | 17.75 |
| COMPLEX.PDB | O, E.VAL.289   | N, E.VAL.308   | H, E.VAL.308    | 2.84 | 1.83 | 5.19  |
| COMPLEX.PDB | O, E.VAL.308   | N, E.ALA.310   | H, E.ALA.310    | 2.76 | 1.93 | 28.55 |
| COMPLEX.PDB | OD1, E.ASN.311 | N, E.ASN.314   | H, E.ASN.314    | 2.88 | 1.92 | 14.82 |
| COMPLEX.PDB | O, E.ASN.311   | N, E.LYS.315   | H, E.LYS.315    | 2.94 | 1.93 | 7.13  |
| COMPLEX.PDB | O, E.VAL.312   | N, E.LYS.316   | H, E.LYS.316    | 2.88 | 1.95 | 19.44 |
| COMPLEX.PDB | O, E.LYS.315   | N, E.LYS.319   | H, E.LYS.319    | 2.86 | 1.87 | 10.80 |
| COMPLEX.PDB | OE2, E.GLU.281 | NZ, E.LYS.319  | 1HZ, E.LYS.319  | 2.86 | 2.03 | 29.01 |
| COMPLEX.PDB | O, E.LYS.316   | N, E.ASP.320   | H, E.ASP.320    | 2.86 | 1.88 | 11.58 |
| COMPLEX.PDB | O, E.VAL.317   | N, E.ALA.321   | H, E.ALA.321    | 2.89 | 1.90 | 11.11 |
| COMPLEX.PDB | O, E.LEU.318   | N, E.VAL.322   | H, E.VAL.322    | 2.88 | 1.91 | 14.12 |
| COMPLEX.PDB | O, E.LYS.319   | N, E.ASN.323   | H, E.ASN.323    | 3.00 | 2.08 | 20.61 |
| COMPLEX.PDB | O, E.VAL.260   | N, E.LYS.328   | H, E.LYS.328    | 2.85 | 1.91 | 18.20 |
| COMPLEX.PDB | O, E.GLY.364   | OH, E.TYR.333  | HH, E.TYR.333   | 2.75 | 1.85 | 17.61 |
| COMPLEX.PDB | OE1, E.GLU.371 | NZ, E.LYS.334  | 3HZ, E.LYS.334  | 2.94 | 1.96 | 13.07 |
| COMPLEX.PDB | OD1, E.ASP.332 | N, E.LYS.335   | H, E.LYS.335    | 2.97 | 1.95 | 4.47  |
| COMPLEX.PDB | O, E.SER.296   | NZ, E.LYS.335  | 2HZ, E.LYS.335  | 2.92 | 1.93 | 10.18 |
| COMPLEX.PDB | O, E.TYR.333   | N, E.PHE.337   | H, E.PHE.337    | 2.86 | 1.86 | 8.03  |
| COMPLEX.PDB | O, E.ASN.346   | N, E.ASN.348   | H, E.ASN.348    | 2.78 | 1.91 | 25.18 |
| COMPLEX.PDB | O, E.LEU.344   | NH1, E.ARG.351 | 2HH1, E.ARG.351 | 2.80 | 1.88 | 20.50 |
| COMPLEX.PDB | OD2, E.ASP.253 | NH2, E.ARG.351 | 1HH2, E.ARG.351 | 2.98 | 2.07 | 20.97 |
| COMPLEX.PDB | OD1, E.ASP.253 | N, E.ALA.352   | H, E.ALA.352    | 2.98 | 1.98 | 8.84  |
| COMPLEX.PDB | OD2, E.ASP.253 | N, E.ASN.353   | H, E.ASN.353    | 2.87 | 1.92 | 16.12 |
| COMPLEX.PDB | O, E.PRO.251   | N, E.ASN.355   | H, E.ASN.355    | 2.90 | 1.91 | 9.74  |
| COMPLEX.PDB | OH, E.TYR.347  | NZ, E.LYS.356  | 1HZ, E.LYS.356  | 2.92 | 1.95 | 13.13 |
| COMPLEX.PDB | O, E.ARG.383   | N, E.ILE.358   | H, E.ILE.358    | 2.96 | 1.98 | 11.55 |



|             |                |                |                 |      |      |       |
|-------------|----------------|----------------|-----------------|------|------|-------|
| COMPLEX.PDB | O, E.LEU.255   | N, E.MET.359   | H, E.MET.359    | 2.90 | 2.03 | 25.46 |
| COMPLEX.PDB | OH, E.TYR.333  | OG1, E.THR.362 | HG1, E.THR.362  | 2.73 | 1.83 | 17.19 |
| COMPLEX.PDB | OD1, E.ASP.363 | N, E.GLY.364   | H, E.GLY.364    | 2.83 | 1.93 | 22.96 |
| COMPLEX.PDB | O, E.ASP.395   | N, E.GLY.365   | H, E.GLY.365    | 2.84 | 1.85 | 10.07 |
| COMPLEX.PDB | OE2, E.GLU.367 | N, E.ALA.369   | H, E.ALA.369    | 2.86 | 1.94 | 19.79 |
| COMPLEX.PDB | O, E.GLN.370   | N, E.ALA.374   | H, E.ALA.374    | 2.93 | 2.04 | 23.80 |
| COMPLEX.PDB | O, E.ILE.372   | N, E.TYR.376   | H, E.TYR.376    | 2.90 | 1.90 | 8.37  |
| COMPLEX.PDB | O, E.ASN.377   | N, E.LYS.380   | H, E.LYS.380    | 2.88 | 1.96 | 20.91 |
| COMPLEX.PDB | OD1, E.ASP.379 | N, E.LYS.381   | H, E.LYS.381    | 2.97 | 1.98 | 11.18 |
| COMPLEX.PDB | O, E.LYS.407   | NH1, E.ARG.383 | 1HH1, E.ARG.383 | 2.99 | 2.00 | 8.92  |
| COMPLEX.PDB | O, E.ILE.358   | N, E.PHE.385   | H, E.PHE.385    | 2.97 | 1.97 | 8.07  |
| COMPLEX.PDB | O, E.TYR.409   | N, E.THR.386   | H, E.THR.386    | 2.97 | 1.97 | 10.08 |
| COMPLEX.PDB | O, E.LEU.360   | N, E.PHE.387   | H, E.PHE.387    | 2.87 | 1.96 | 21.42 |
| COMPLEX.PDB | O, E.TYR.411   | N, E.SER.388   | H, E.SER.388    | 2.84 | 1.84 | 8.42  |
| COMPLEX.PDB | O, E.ASP.363   | OG, E.SER.388  | HG, E.SER.388   | 2.77 | 1.81 | 9.13  |
| COMPLEX.PDB | O, E.THR.362   | N, E.VAL.389   | H, E.VAL.389    | 2.78 | 1.76 | 3.67  |
| COMPLEX.PDB | O, E.ILE.413   | N, E.GLY.390   | H, E.GLY.390    | 2.81 | 1.84 | 13.35 |
| COMPLEX.PDB | OE2, E.GLU.412 | NH1, E.ARG.396 | 1HH1, E.ARG.396 | 2.89 | 1.91 | 11.57 |
| COMPLEX.PDB | OD1, E.ASP.395 | N, E.GLY.397   | H, E.GLY.397    | 2.86 | 1.93 | 19.24 |
| COMPLEX.PDB | O, E.ARG.396   | N, E.GLN.400   | H, E.GLN.400    | 2.88 | 1.91 | 13.05 |
| COMPLEX.PDB | O, E.GLY.397   | N, E.TRP.401   | H, E.TRP.401    | 2.89 | 1.90 | 11.37 |
| COMPLEX.PDB | O, E.PRO.398   | N, E.MET.402   | H, E.MET.402    | 2.95 | 2.06 | 23.71 |
| COMPLEX.PDB | O, E.GLN.400   | N, E.CYS.404   | H, E.CYS.404    | 2.97 | 1.97 | 9.59  |
| COMPLEX.PDB | O, E.TRP.401   | N, E.GLU.405   | H, E.GLU.405    | 2.97 | 1.96 | 5.62  |
| COMPLEX.PDB | O, E.MET.402   | ND2, E.ASN.406 | 2HD2, E.ASN.406 | 2.89 | 1.90 | 10.58 |
| COMPLEX.PDB | O, E.ALA.403   | N, E.GLY.408   | H, E.GLY.408    | 2.87 | 1.89 | 13.49 |
| COMPLEX.PDB | OE2, E.GLU.412 | OH, E.TYR.410  | HH, E.TYR.410   | 2.72 | 1.77 | 11.16 |
| COMPLEX.PDB | O, E.THR.386   | N, E.TYR.411   | H, E.TYR.411    | 2.87 | 1.95 | 20.28 |
| COMPLEX.PDB | O, E.SER.388   | N, E.ILE.413   | H, E.ILE.413    | 2.84 | 1.84 | 8.17  |
| COMPLEX.PDB | O, E.ALA.418   | ND2, E.ASN.422 | 2HD2, E.ASN.422 | 2.88 | 1.89 | 7.42  |
| COMPLEX.PDB | O, E.ILE.419   | N, E.THR.423   | H, E.THR.423    | 2.95 | 1.97 | 12.17 |
| COMPLEX.PDB | O, E.GLY.431   | N, E.VAL.435   | H, E.VAL.435    | 2.95 | 1.95 | 10.08 |
| COMPLEX.PDB | O, E.VAL.435   | N, E.GLY.438   | H, E.GLY.438    | 3.00 | 2.10 | 22.79 |
| COMPLEX.PDB | O, E.ASP.439   | N, E.LYS.442   | H, E.LYS.442    | 3.00 | 2.08 | 20.89 |
| COMPLEX.PDB | O, E.ASN.448   | OG1, E.THR.447 | HG1, E.THR.447  | 2.98 | 2.06 | 14.27 |
| COMPLEX.PDB | OG1, E.THR.461 | OH, E.TYR.450  | HH, E.TYR.450   | 2.76 | 1.91 | 23.68 |
| COMPLEX.PDB | OD1, E.ASP.452 | N, E.LEU.454   | H, E.LEU.454    | 2.97 | 2.07 | 23.06 |
| COMPLEX.PDB | OD2, E.ASP.452 | N, E.GLY.457   | H, E.GLY.457    | 2.89 | 1.89 | 8.00  |
| COMPLEX.PDB | O, E.TYR.450   | N, E.VAL.459   | H, E.VAL.459    | 2.84 | 1.82 | 0.96  |
| COMPLEX.PDB | O, E.VAL.492   | N, E.ILE.460   | H, E.ILE.460    | 2.97 | 1.98 | 12.35 |
| COMPLEX.PDB | OG1, E.THR.447 | N, E.THR.461   | H, E.THR.461    | 2.94 | 1.93 | 5.82  |
| COMPLEX.PDB | OD1, E.ASP.491 | OG1, E.THR.461 | HG1, E.THR.461  | 2.75 | 1.78 | 5.29  |
| COMPLEX.PDB | O, E.VAL.490   | N, E.GLY.462   | H, E.GLY.462    | 2.86 | 1.85 | 6.36  |
| COMPLEX.PDB | O, E.GLN.445   | N, E.THR.463   | H, E.THR.463    | 2.83 | 1.84 | 10.98 |
| COMPLEX.PDB | O, E.MET.488   | N, E.LEU.464   | H, E.LEU.464    | 3.00 | 2.02 | 13.26 |
| COMPLEX.PDB | O, E.GLY.486   | N, E.VAL.466   | H, E.VAL.466    | 2.85 | 1.86 | 11.32 |
| COMPLEX.PDB | OE2, E.GLU.105 | N, E.PHE.467   | H, E.PHE.467    | 2.90 | 1.89 | 5.51  |
| COMPLEX.PDB | O, E.LYS.480   | ND2, E.ASN.468 | 2HD2, E.ASN.468 | 2.94 | 2.03 | 20.97 |
| COMPLEX.PDB | O, E.VAL.469   | OG1, E.THR.470 | HG1, E.THR.470  | 2.84 | 1.92 | 14.21 |
| COMPLEX.PDB | O, E.GLY.471   | N, E.LYS.476   | H, E.LYS.476    | 2.99 | 1.98 | 5.55  |
| COMPLEX.PDB | OD1, E.ASN.475 | ND2, E.ASN.478 | 1HD2, E.ASN.478 | 2.92 | 1.93 | 8.35  |
| COMPLEX.PDB | O, E.ASN.468   | ND2, E.ASN.481 | 2HD2, E.ASN.481 | 2.98 | 2.01 | 12.76 |
| COMPLEX.PDB | O, E.VAL.466   | N, E.LEU.485   | H, E.LEU.485    | 2.81 | 1.85 | 14.87 |
| COMPLEX.PDB | O, E.GLY.209   | N, E.VAL.487   | H, E.VAL.487    | 2.88 | 1.90 | 12.57 |
| COMPLEX.PDB | O, E.LEU.464   | N, E.MET.488   | H, E.MET.488    | 2.86 | 1.85 | 0.65  |
| COMPLEX.PDB | O, E.ILE.460   | N, E.VAL.492   | H, E.VAL.492    | 2.92 | 1.92 | 9.90  |
| COMPLEX.PDB | OD2, E.ASP.496 | N, E.SER.493   | H, E.SER.493    | 2.90 | 1.93 | 13.62 |
| COMPLEX.PDB | OD2, E.ASP.496 | OG, E.SER.493  | HG, E.SER.493   | 2.79 | 1.85 | 10.99 |

|             |                |                |                 |      |      |       |
|-------------|----------------|----------------|-----------------|------|------|-------|
| COMPLEX.PDB | O, E.LEU.494   | N, E.LYS.498   | H, E.LYS.498    | 2.89 | 1.93 | 15.91 |
| COMPLEX.PDB | O, E.ILE.497   | N, E.LEU.500   | H, E.LEU.500    | 2.98 | 2.09 | 22.88 |
| COMPLEX.PDB | O, E.ILE.497   | OG1, E.THR.501 | HG1, E.THR.501  | 2.96 | 2.04 | 14.59 |
| COMPLEX.PDB | OE2, E.GLU.748 | NH2, E.ARG.503 | 2HH2, E.ARG.503 | 2.87 | 1.91 | 15.22 |
| COMPLEX.PDB | OH, E.TYR.607  | ND2, E.ASN.509 | 2HD2, E.ASN.509 | 2.97 | 2.01 | 14.80 |
| COMPLEX.PDB | O, E.CYS.507   | N, E.GLY.510   | H, E.GLY.510    | 2.89 | 1.91 | 11.87 |
| COMPLEX.PDB | OE2, E.GLU.546 | OH, E.TYR.511  | HH, E.TYR.511   | 2.64 | 1.68 | 7.93  |
| COMPLEX.PDB | O, E.ALA.601   | N, E.PHE.513   | H, E.PHE.513    | 2.99 | 2.00 | 11.79 |
| COMPLEX.PDB | O, E.LEU.523   | N, E.ALA.514   | H, E.ALA.514    | 2.85 | 1.88 | 13.32 |
| COMPLEX.PDB | O, E.SER.599   | N, E.ILE.515   | H, E.ILE.515    | 2.89 | 1.90 | 12.12 |
| COMPLEX.PDB | O, E.TYR.520   | N, E.ASP.516   | H, E.ASP.516    | 2.83 | 1.83 | 6.83  |
| COMPLEX.PDB | OD1, E.ASP.516 | N, E.ASN.518   | H, E.ASN.518    | 2.96 | 1.95 | 6.80  |
| COMPLEX.PDB | OD1, E.ASP.286 | ND2, E.ASN.518 | 1HD2, E.ASN.518 | 2.98 | 2.02 | 15.09 |
| COMPLEX.PDB | O, E.ASP.516   | N, E.GLY.519   | H, E.GLY.519    | 2.81 | 1.84 | 14.07 |
| COMPLEX.PDB | OD1, E.ASP.285 | OH, E.TYR.520  | HH, E.TYR.520   | 2.61 | 1.65 | 7.75  |
| COMPLEX.PDB | O, E.LEU.540   | N, E.VAL.521   | H, E.VAL.521    | 2.89 | 1.92 | 12.99 |
| COMPLEX.PDB | O, E.ALA.514   | N, E.LEU.522   | H, E.LEU.522    | 2.84 | 1.93 | 21.87 |
| COMPLEX.PDB | OE2, E.GLU.546 | NE2, E.HIS.524 | HE2, E.HIS.524  | 2.89 | 1.87 | 3.11  |
| COMPLEX.PDB | OE1, E.GLN.889 | N, E.GLN.528   | H, E.GLN.528    | 2.97 | 1.96 | 6.96  |
| COMPLEX.PDB | O, E.VAL.449   | N, E.VAL.538   | H, E.VAL.538    | 2.86 | 1.84 | 5.35  |
| COMPLEX.PDB | OD2, E.ASP.541 | N, E.LEU.543   | H, E.LEU.543    | 2.91 | 1.90 | 3.52  |
| COMPLEX.PDB | O, E.ASP.541   | N, E.ASP.544   | H, E.ASP.544    | 2.98 | 2.05 | 19.81 |
| COMPLEX.PDB | O, E.ASP.541   | N, E.ALA.545   | H, E.ALA.545    | 2.88 | 1.94 | 17.77 |
| COMPLEX.PDB | OE1, E.GLU.546 | NZ, E.LYS.552  | 1HZ, E.LYS.552  | 2.88 | 1.92 | 14.82 |
| COMPLEX.PDB | O, E.LEU.547   | NZ, E.LYS.552  | 3HZ, E.LYS.552  | 2.89 | 1.88 | 6.83  |
| COMPLEX.PDB | O, E.LYS.552   | N, E.ARG.556   | H, E.ARG.556    | 2.91 | 1.92 | 12.24 |
| COMPLEX.PDB | OD2, E.ASP.541 | NE, E.ARG.556  | HE, E.ARG.556   | 2.92 | 1.95 | 14.11 |
| COMPLEX.PDB | OD1, E.ASN.557 | NH1, E.ARG.556 | 1HH1, E.ARG.556 | 2.90 | 2.00 | 22.19 |
| COMPLEX.PDB | OD1, E.ASP.541 | NH2, E.ARG.556 | 1HH2, E.ARG.556 | 2.85 | 1.84 | 6.22  |
| COMPLEX.PDB | O, E.VAL.553   | N, E.ASN.557   | H, E.ASN.557    | 2.89 | 1.90 | 11.50 |
| COMPLEX.PDB | O, E.GLU.554   | N, E.LYS.558   | H, E.LYS.558    | 2.98 | 2.00 | 12.10 |
| COMPLEX.PDB | O, E.ARG.556   | N, E.ILE.560   | H, E.ILE.560    | 2.89 | 1.93 | 14.39 |
| COMPLEX.PDB | O, E.TYR.588   | N, E.LYS.567   | H, E.LYS.567    | 2.92 | 1.94 | 14.06 |
| COMPLEX.PDB | OE1, E.GLU.554 | NZ, E.LYS.567  | 1HZ, E.LYS.567  | 2.96 | 2.06 | 21.68 |
| COMPLEX.PDB | O, E.ARG.586   | N, E.PHE.569   | H, E.PHE.569    | 2.89 | 1.89 | 7.99  |
| COMPLEX.PDB | O, E.GLY.584   | N, E.THR.571   | H, E.THR.571    | 2.90 | 1.97 | 19.39 |
| COMPLEX.PDB | O, E.ASP.582   | N, E.VAL.573   | H, E.VAL.573    | 2.78 | 1.77 | 2.98  |
| COMPLEX.PDB | OE1, E.GLN.966 | NZ, E.LYS.574  | 2HZ, E.LYS.574  | 2.91 | 1.94 | 13.40 |
| COMPLEX.PDB | O, E.TYR.580   | N, E.SER.575   | H, E.SER.575    | 2.99 | 1.98 | 4.52  |
| COMPLEX.PDB | O, E.ASP.577   | OG, E.SER.575  | HG, E.SER.575   | 2.69 | 1.82 | 21.25 |
| COMPLEX.PDB | O, E.ASP.577   | N, E.ARG.579   | H, E.ARG.579    | 2.89 | 2.01 | 24.07 |
| COMPLEX.PDB | OD2, E.ASP.577 | NE, E.ARG.579  | HE, E.ARG.579   | 2.81 | 1.80 | 5.72  |
| COMPLEX.PDB | O, E.ALA.765   | NH1, E.ARG.579 | 2HH1, E.ARG.579 | 2.96 | 1.98 | 12.37 |
| COMPLEX.PDB | OD2, E.ASP.842 | OH, E.TYR.580  | HH, E.TYR.580   | 2.73 | 1.77 | 8.61  |
| COMPLEX.PDB | O, E.VAL.573   | N, E.ASP.582   | H, E.ASP.582    | 2.90 | 1.90 | 9.87  |
| COMPLEX.PDB | O, E.PHE.971   | NZ, E.LYS.583  | 1HZ, E.LYS.583  | 2.94 | 2.08 | 26.42 |
| COMPLEX.PDB | O, E.THR.571   | N, E.GLY.584   | H, E.GLY.584    | 2.96 | 2.11 | 27.67 |
| COMPLEX.PDB | OD1, E.ASP.757 | NH1, E.ARG.586 | 2HH1, E.ARG.586 | 2.99 | 2.09 | 22.44 |
| COMPLEX.PDB | O, E.ASN.585   | NH2, E.ARG.586 | 1HH2, E.ARG.586 | 3.00 | 2.00 | 6.66  |
| COMPLEX.PDB | OD1, E.ASP.757 | NH2, E.ARG.586 | 2HH2, E.ARG.586 | 2.88 | 1.93 | 16.41 |
| COMPLEX.PDB | O, E.LEU.604   | N, E.THR.587   | H, E.THR.587    | 2.82 | 1.81 | 4.23  |
| COMPLEX.PDB | OG1, E.THR.568 | OG1, E.THR.587 | HG1, E.THR.587  | 2.95 | 1.99 | 3.79  |
| COMPLEX.PDB | O, E.LYS.567   | N, E.TYR.588   | H, E.TYR.588    | 2.77 | 1.76 | 5.35  |
| COMPLEX.PDB | O, E.LEU.602   | N, E.THR.589   | H, E.THR.589    | 2.95 | 2.01 | 18.23 |
| COMPLEX.PDB | O, E.GLY.565   | N, E.TRP.590   | H, E.TRP.590    | 2.98 | 1.98 | 8.82  |
| COMPLEX.PDB | O, E.LEU.600   | N, E.THR.591   | H, E.THR.591    | 2.97 | 1.98 | 12.11 |
| COMPLEX.PDB | OG, E.SER.564  | OG1, E.THR.591 | HG1, E.THR.591  | 2.79 | 1.86 | 13.03 |
| COMPLEX.PDB | O, E.TYR.598   | N, E.VAL.593   | H, E.VAL.593    | 2.91 | 1.90 | 6.90  |

|             |                |                |                 |      |      |       |
|-------------|----------------|----------------|-----------------|------|------|-------|
| COMPLEX.PDB | OE1, E_GLU_87  | N, E_GLY_595   | H, E_GLY_595    | 2.98 | 2.15 | 28.93 |
| COMPLEX.PDB | O, E_VAL_593   | N, E_THR_596   | H, E_THR_596    | 2.94 | 1.98 | 15.05 |
| COMPLEX.PDB | O, E_MET_559   | OG, E_SER_599  | HG, E_SER_599   | 2.70 | 1.74 | 9.61  |
| COMPLEX.PDB | O, E_THR_591   | N, E_LEU_600   | H, E_LEU_600    | 2.94 | 1.92 | 0.64  |
| COMPLEX.PDB | O, E_PHE_513   | N, E_ALA_601   | H, E_ALA_601    | 2.83 | 1.84 | 11.64 |
| COMPLEX.PDB | O, E_THR_589   | N, E_LEU_602   | H, E_LEU_602    | 2.91 | 1.93 | 12.09 |
| COMPLEX.PDB | O, E_TYR_511   | N, E_VAL_603   | H, E_VAL_603    | 2.84 | 1.86 | 12.70 |
| COMPLEX.PDB | O, E_THR_587   | N, E_LEU_604   | H, E_LEU_604    | 2.90 | 1.90 | 8.12  |
| COMPLEX.PDB | O, E_PRO_605   | N, E_TYR_607   | H, E_TYR_607    | 2.80 | 1.96 | 27.81 |
| COMPLEX.PDB | O, E_PRO_605   | OG, E_SER_608  | HG, E_SER_608   | 2.78 | 1.81 | 5.72  |
| COMPLEX.PDB | O, E_GLU_71    | N, E_TYR_611   | H, E_TYR_611    | 2.91 | 1.95 | 15.64 |
| COMPLEX.PDB | OE1, E_GLU_71  | OH, E_TYR_611  | HH, E_TYR_611   | 2.82 | 1.92 | 18.25 |
| COMPLEX.PDB | O, E_THR_69    | N, E_LYS_613   | H, E_LYS_613    | 2.91 | 1.90 | 6.61  |
| COMPLEX.PDB | O, E_LEU_67    | N, E_LYS_615   | H, E_LYS_615    | 2.87 | 1.88 | 10.70 |
| COMPLEX.PDB | OD1, E_ASP_66  | NZ, E_LYS_615  | 1HZ, E_LYS_615  | 2.90 | 1.91 | 9.67  |
| COMPLEX.PDB | O, E_ILE_616   | NE2, E_GLN_622 | 2HE2, E_GLN_622 | 2.94 | 2.13 | 29.95 |
| COMPLEX.PDB | O, E_ILE_620   | N, E_ALA_623   | H, E_ALA_623    | 2.98 | 2.11 | 25.11 |
| COMPLEX.PDB | OE1, E_GLU_618 | NZ, E_LYS_626  | 2HZ, E_LYS_626  | 2.87 | 1.92 | 16.82 |
| COMPLEX.PDB | OE2, E_GLU_634 | NZ, E_LYS_627  | 2HZ, E_LYS_627  | 2.91 | 2.07 | 28.11 |
| COMPLEX.PDB | O, E_ARG_624   | N, E_GLY_628   | H, E_GLY_628    | 2.88 | 1.93 | 17.22 |
| COMPLEX.PDB | OE2, E_GLU_643 | NZ, E_LYS_631  | 2HZ, E_LYS_631  | 2.89 | 1.90 | 10.46 |
| COMPLEX.PDB | O, E_LYS_631   | OG, E_SER_633  | HG, E_SER_633   | 2.88 | 1.92 | 2.30  |
| COMPLEX.PDB | O, E_LYS_637   | N, E_ASN_640   | H, E_ASN_640    | 2.89 | 2.02 | 25.19 |
| COMPLEX.PDB | O, E_GLU_634   | ND2, E_ASN_640 | 2HD2, E_ASN_640 | 2.93 | 1.93 | 7.96  |
| COMPLEX.PDB | O, E_ASN_640   | OG, E_SER_644  | HG, E_SER_644   | 2.63 | 1.71 | 15.39 |
| COMPLEX.PDB | O, E_VAL_731   | N, E_TYR_646   | H, E_TYR_646    | 2.80 | 1.84 | 16.24 |
| COMPLEX.PDB | OE2, E_GLU_738 | OH, E_TYR_646  | HH, E_TYR_646   | 2.79 | 1.86 | 12.86 |
| COMPLEX.PDB | O, E_THR_729   | N, E_PHE_648   | H, E_PHE_648    | 2.82 | 1.83 | 9.93  |
| COMPLEX.PDB | O, E_GLY_727   | N, E_ALA_650   | H, E_ALA_650    | 2.82 | 1.90 | 20.77 |
| COMPLEX.PDB | O, E_ALA_650   | N, E_ARG_652   | H, E_ARG_652    | 2.82 | 1.94 | 24.68 |
| COMPLEX.PDB | O, E_GLY_726   | NH2, E_ARG_652 | 1HH2, E_ARG_652 | 2.90 | 2.06 | 28.37 |
| COMPLEX.PDB | O, E_ALA_650   | OH, E_TYR_654  | HH, E_TYR_654   | 2.85 | 1.94 | 15.02 |
| COMPLEX.PDB | O, E_ASN_656   | NZ, E_LYS_659  | 3HZ, E_LYS_659  | 2.98 | 2.10 | 24.48 |
| COMPLEX.PDB | O, E_ASN_663   | OG, E_SER_661  | HG, E_SER_661   | 2.78 | 1.93 | 22.64 |
| COMPLEX.PDB | O, E_SER_661   | N, E_ASN_663   | H, E_ASN_663    | 2.83 | 1.93 | 22.11 |
| COMPLEX.PDB | O, E_ILE_649   | ND2, E_ASN_664 | 1HD2, E_ASN_664 | 2.77 | 1.79 | 10.69 |
| COMPLEX.PDB | O, E_ASN_664   | N, E_LEU_668   | H, E_LEU_668    | 2.89 | 1.89 | 9.15  |
| COMPLEX.PDB | O, E_PHE_667   | N, E_PHE_671   | H, E_PHE_671    | 2.81 | 1.84 | 13.45 |
| COMPLEX.PDB | O, E_LEU_668   | N, E_ASN_672   | H, E_ASN_672    | 2.92 | 1.93 | 11.42 |
| COMPLEX.PDB | O, E_LEU_636   | ND2, E_ASN_672 | 1HD2, E_ASN_672 | 2.99 | 2.10 | 23.07 |
| COMPLEX.PDB | O, E_ASN_670   | N, E_PHE_674   | H, E_PHE_674    | 2.92 | 2.01 | 21.21 |
| COMPLEX.PDB | O, E_GLU_673   | N, E_ARG_677   | H, E_ARG_677    | 2.89 | 1.94 | 16.66 |
| COMPLEX.PDB | O, E_PHE_674   | N, E_LYS_678   | H, E_LYS_678    | 2.93 | 2.08 | 27.19 |
| COMPLEX.PDB | OD1, E_ASN_686 | N, E_ASP_688   | H, E_ASP_688    | 2.92 | 2.01 | 21.18 |
| COMPLEX.PDB | O, E_THR_687   | N, E_ASN_691   | H, E_ASN_691    | 2.90 | 1.91 | 10.83 |
| COMPLEX.PDB | O, E_ILE_616   | ND2, E_ASN_691 | 1HD2, E_ASN_691 | 2.98 | 2.00 | 11.63 |
| COMPLEX.PDB | O, E_ASP_688   | N, E_ARG_692   | H, E_ARG_692    | 2.94 | 1.94 | 10.04 |
| COMPLEX.PDB | O, E_ILE_690   | N, E_LEU_694   | H, E_LEU_694    | 2.89 | 1.91 | 12.69 |
| COMPLEX.PDB | O, E_ARG_692   | N, E_ASP_696   | H, E_ASP_696    | 2.90 | 1.98 | 19.91 |
| COMPLEX.PDB | O, E_ILE_693   | N, E_ALA_697   | H, E_ALA_697    | 2.95 | 2.03 | 20.56 |
| COMPLEX.PDB | O, E_ASP_696   | N, E_THR_700   | H, E_THR_700    | 2.93 | 1.92 | 4.56  |
| COMPLEX.PDB | O, E_ASP_696   | OG1, E_THR_700 | HG1, E_THR_700  | 2.89 | 1.95 | 12.41 |
| COMPLEX.PDB | O, E_ASN_701   | N, E_GLN_705   | H, E_GLN_705    | 2.84 | 1.83 | 2.43  |
| COMPLEX.PDB | O, E_GLU_702   | N, E_ASN_706   | H, E_ASN_706    | 2.83 | 1.85 | 12.85 |
| COMPLEX.PDB | O, E_THR_50    | OH, E_TYR_707  | HH, E_TYR_707   | 2.71 | 1.74 | 3.53  |
| COMPLEX.PDB | O, E_VAL_704   | N, E_SER_709   | H, E_SER_709    | 2.91 | 1.93 | 12.67 |
| COMPLEX.PDB | O, E_LYS_803   | N, E_LYS_718   | H, E_LYS_718    | 2.79 | 1.85 | 17.86 |
| COMPLEX.PDB | O, E_GLN_711   | NH1, E_ARG_720 | 2HH1, E_ARG_720 | 2.84 | 1.99 | 27.14 |

|             |                |                |                 |      |      |       |
|-------------|----------------|----------------|-----------------|------|------|-------|
| COMPLEX.PDB | O, E_GLN_711   | NH2, E_ARG_720 | 2HH2, E_ARG_720 | 2.91 | 2.08 | 28.08 |
| COMPLEX.PDB | O, E_GLY_801   | N, E_PHE_721   | H, E_PHE_721    | 2.95 | 1.99 | 14.99 |
| COMPLEX.PDB | O, E_ARG_730   | N, E_VAL_722   | H, E_VAL_722    | 2.96 | 2.00 | 14.73 |
| COMPLEX.PDB | O, E_VAL_799   | N, E_VAL_723   | H, E_VAL_723    | 2.85 | 1.84 | 3.87  |
| COMPLEX.PDB | O, E_ILE_728   | N, E_THR_724   | H, E_THR_724    | 2.98 | 2.06 | 20.81 |
| COMPLEX.PDB | OD1, E_ASP_696 | OG1, E_THR_724 | HG1, E_THR_724  | 2.95 | 2.05 | 18.78 |
| COMPLEX.PDB | O, E_THR_724   | N, E_GLY_727   | H, E_GLY_727    | 2.99 | 2.09 | 21.97 |
| COMPLEX.PDB | O, E_PHE_648   | N, E_THR_729   | H, E_THR_729    | 2.98 | 1.96 | 0.91  |
| COMPLEX.PDB | O, E_VAL_722   | N, E_ARG_730   | H, E_ARG_730    | 2.92 | 1.93 | 10.71 |
| COMPLEX.PDB | O, E_SER_644   | NE, E_ARG_730  | HE, E_ARG_730   | 2.81 | 1.84 | 13.10 |
| COMPLEX.PDB | O, E_THR_635   | NH1, E_ARG_730 | 2HH1, E_ARG_730 | 2.89 | 1.94 | 16.49 |
| COMPLEX.PDB | O, E_ARG_720   | N, E_TYR_732   | H, E_TYR_732    | 2.89 | 1.87 | 3.44  |
| COMPLEX.PDB | OD1, E_ASN_743 | N, E_GLU_745   | H, E_GLU_745    | 2.94 | 1.94 | 8.91  |
| COMPLEX.PDB | OD1, E_ASP_725 | OH, E_TYR_747  | HH, E_TYR_747   | 2.67 | 1.74 | 12.91 |
| COMPLEX.PDB | O, E_GLU_745   | N, E_GLU_748   | H, E_GLU_748    | 2.92 | 1.93 | 11.37 |
| COMPLEX.PDB | OD2, E_ASP_582 | NE, E_ARG_754  | HE, E_ARG_754   | 2.90 | 1.89 | 4.50  |
| COMPLEX.PDB | OD1, E_ASP_843 | NH1, E_ARG_754 | 2HH1, E_ARG_754 | 2.92 | 2.03 | 23.47 |
| COMPLEX.PDB | OD1, E_ASP_582 | NH2, E_ARG_754 | 1HH2, E_ARG_754 | 2.83 | 1.94 | 23.45 |
| COMPLEX.PDB | OD2, E_ASP_843 | NH2, E_ARG_754 | 2HH2, E_ARG_754 | 2.89 | 1.95 | 18.36 |
| COMPLEX.PDB | O, E_PHE_751   | N, E_SER_755   | H, E_SER_755    | 2.94 | 1.99 | 16.83 |
| COMPLEX.PDB | O, E_PHE_751   | OG, E_SER_755  | HG, E_SER_755   | 2.72 | 1.75 | 6.55  |
| COMPLEX.PDB | O, E_LYS_753   | N, E_ASP_757   | H, E_ASP_757    | 2.99 | 2.03 | 15.55 |
| COMPLEX.PDB | OD1, E_ASP_582 | ND2, E_ASN_758 | 1HD2, E_ASN_758 | 2.94 | 1.96 | 11.82 |
| COMPLEX.PDB | O, E_ARG_754   | ND2, E_ASN_758 | 2HD2, E_ASN_758 | 2.92 | 1.97 | 16.08 |
| COMPLEX.PDB | O, E_SER_783   | N, E_VAL_762   | H, E_VAL_762    | 2.88 | 1.88 | 6.26  |
| COMPLEX.PDB | O, E_MET_781   | N, E_THR_764   | H, E_THR_764    | 2.81 | 1.83 | 13.11 |
| COMPLEX.PDB | OH, E_TYR_580  | N, E_ALA_765   | H, E_ALA_765    | 2.97 | 1.98 | 9.62  |
| COMPLEX.PDB | OE2, E_GLU_777 | N, E_ALA_775   | H, E_ALA_775    | 2.80 | 1.83 | 14.49 |
| COMPLEX.PDB | O, E_ALA_775   | N, E_GLY_779   | H, E_GLY_779    | 2.87 | 1.93 | 18.01 |
| COMPLEX.PDB | O, E_ILE_802   | N, E_VAL_782   | H, E_VAL_782    | 2.84 | 1.85 | 11.63 |
| COMPLEX.PDB | O, E_VAL_762   | N, E_SER_783   | H, E_SER_783    | 2.85 | 1.86 | 11.00 |
| COMPLEX.PDB | OG, E_SER_755  | OG, E_SER_783  | HG, E_SER_783   | 2.82 | 1.99 | 26.18 |
| COMPLEX.PDB | O, E_VAL_800   | N, E_LYS_784   | H, E_LYS_784    | 2.90 | 1.91 | 10.94 |
| COMPLEX.PDB | O, E_ALA_798   | N, E_VAL_786   | H, E_VAL_786    | 2.85 | 1.83 | 3.10  |
| COMPLEX.PDB | OE2, E_GLU_787 | OH, E_TYR_789  | HH, E_TYR_789   | 2.88 | 2.00 | 19.65 |
| COMPLEX.PDB | O, E_LEU_788   | N, E_LEU_795   | H, E_LEU_795    | 2.92 | 1.92 | 8.04  |
| COMPLEX.PDB | O, E_VAL_723   | N, E_VAL_799   | H, E_VAL_799    | 2.85 | 1.85 | 7.03  |
| COMPLEX.PDB | O, E_LYS_784   | N, E_VAL_800   | H, E_VAL_800    | 2.96 | 1.96 | 9.55  |
| COMPLEX.PDB | O, E_PHE_721   | N, E_GLY_801   | H, E_GLY_801    | 2.95 | 2.01 | 17.74 |
| COMPLEX.PDB | O, E_VAL_782   | N, E_ILE_802   | H, E_ILE_802    | 2.91 | 1.92 | 11.23 |
| COMPLEX.PDB | O, E_ALA_719   | N, E_LYS_803   | H, E_LYS_803    | 2.83 | 1.85 | 11.86 |
| COMPLEX.PDB | OG, E_SER_778  | NZ, E_LYS_803  | 3HZ, E_LYS_803  | 2.98 | 2.03 | 15.64 |
| COMPLEX.PDB | O, E_ILE_780   | N, E_ILE_804   | H, E_ILE_804    | 2.79 | 1.78 | 4.97  |
| COMPLEX.PDB | O, E_GLY_716   | N, E_ASP_805   | H, E_ASP_805    | 2.90 | 1.89 | 1.39  |
| COMPLEX.PDB | OD2, E_ASP_805 | OG, E_SER_808  | HG, E_SER_808   | 2.69 | 1.73 | 8.01  |
| COMPLEX.PDB | O, E_SER_808   | N, E_ASN_812   | H, E_ASN_812    | 2.99 | 2.02 | 14.40 |
| COMPLEX.PDB | O, E_TRP_809   | N, E_PHE_813   | H, E_PHE_813    | 2.83 | 1.95 | 23.97 |
| COMPLEX.PDB | O, E_ILE_810   | N, E_THR_814   | H, E_THR_814    | 2.89 | 1.93 | 14.55 |
| COMPLEX.PDB | O, E_ILE_810   | OG1, E_THR_814 | HG1, E_THR_814  | 2.70 | 1.74 | 5.57  |
| COMPLEX.PDB | O, E_GLU_811   | N, E_LYS_815   | H, E_LYS_815    | 2.91 | 1.95 | 15.65 |
| COMPLEX.PDB | OD1, E_ASP_853 | NE, E_ARG_831  | HE, E_ARG_831   | 2.89 | 2.00 | 23.79 |
| COMPLEX.PDB | O, E_ASN_851   | N, E_ASN_832   | H, E_ASN_832    | 2.95 | 1.94 | 4.98  |
| COMPLEX.PDB | O, E_ASP_842   | N, E_GLY_845   | H, E_GLY_845    | 2.91 | 1.98 | 19.51 |
| COMPLEX.PDB | OD1, E_ASP_842 | N, E_PHE_846   | H, E_PHE_846    | 2.82 | 1.84 | 13.47 |
| COMPLEX.PDB | O, E_ILE_840   | N, E_LEU_848   | H, E_LEU_848    | 2.94 | 1.95 | 9.65  |
| COMPLEX.PDB | O, E_LYS_830   | ND2, E_ASN_851 | 1HD2, E_ASN_851 | 2.83 | 1.94 | 23.05 |
| COMPLEX.PDB | OD1, E_ASP_837 | ND2, E_ASN_851 | 2HD2, E_ASN_851 | 2.91 | 1.91 | 8.10  |
| COMPLEX.PDB | OD1, E_ASP_837 | ND1, E_HIS_852 | HD1, E_HIS_852  | 2.87 | 1.91 | 17.61 |

|             |                |                |                 |      |      |       |
|-------------|----------------|----------------|-----------------|------|------|-------|
| COMPLEX.PDB | O, E_HIS_852   | N, E_ASP_854   | H, E_ASP_854    | 2.79 | 1.89 | 22.92 |
| COMPLEX.PDB | O, E_LEU_847   | N, E_GLY_860   | H, E_GLY_860    | 2.82 | 1.85 | 13.93 |
| COMPLEX.PDB | OE1, E_GLU_865 | NE, E_ARG_861  | HE, E_ARG_861   | 2.98 | 2.01 | 12.72 |
| COMPLEX.PDB | O, E_GLY_845   | N, E_PHE_863   | H, E_PHE_863    | 2.84 | 1.82 | 3.36  |
| COMPLEX.PDB | O, E_PHE_862   | N, E_GLU_865   | H, E_GLU_865    | 2.93 | 1.96 | 13.91 |
| COMPLEX.PDB | O, E_PHE_863   | N, E_ASP_867   | H, E_ASP_867    | 2.82 | 1.81 | 5.29  |
| COMPLEX.PDB | O, E_PRO_868   | N, E_ARG_872   | H, E_ARG_872    | 2.98 | 2.02 | 16.64 |
| COMPLEX.PDB | O, E_MET_870   | N, E_LEU_874   | H, E_LEU_874    | 2.89 | 1.94 | 17.19 |
| COMPLEX.PDB | O, E_ARG_872   | N, E_ASN_876   | H, E_ASN_876    | 2.98 | 2.02 | 15.46 |
| COMPLEX.PDB | O, E_HIS_873   | N, E_ILE_877   | H, E_ILE_877    | 2.94 | 1.98 | 14.98 |
| COMPLEX.PDB | O, E_ILE_877   | OG, E_SER_878  | HG, E_SER_878   | 2.62 | 1.70 | 14.57 |
| COMPLEX.PDB | O, E_PHE_970   | N, E_ALA_881   | H, E_ALA_881    | 2.97 | 2.11 | 26.30 |
| COMPLEX.PDB | O, E_GLN_966   | N, E_SER_885   | H, E_SER_885    | 2.93 | 1.97 | 16.36 |
| COMPLEX.PDB | O, E_THR_964   | N, E_ASP_887   | H, E_ASP_887    | 2.84 | 1.84 | 8.65  |
| COMPLEX.PDB | O, E_GLN_528   | NE2, E_GLN_889 | 1HE2, E_GLN_889 | 2.88 | 1.93 | 16.41 |
| COMPLEX.PDB | OG1, E_THR_964 | OG, E_SER_890  | HG, E_SER_890   | 2.71 | 1.79 | 15.36 |
| COMPLEX.PDB | O, E_GLN_900   | N, E_ALA_902   | H, E_ALA_902    | 2.97 | 2.08 | 23.31 |
| COMPLEX.PDB | O, E_GLY_895   | NH2, E_ARG_905 | 1HH2, E_ARG_905 | 2.95 | 1.99 | 14.37 |
| COMPLEX.PDB | O, E_TRP_921   | N, E_THR_923   | H, E_THR_923    | 2.92 | 2.05 | 25.12 |
| COMPLEX.PDB | O, E_LEU_933   | N, E_SER_936   | H, E_SER_936    | 2.83 | 1.85 | 11.53 |
| COMPLEX.PDB | O, E_LEU_933   | OG, E_SER_936  | HG, E_SER_936   | 2.78 | 1.82 | 7.52  |
| COMPLEX.PDB | O, E_THR_954   | OG, E_SER_956  | HG, E_SER_956   | 2.91 | 1.98 | 13.24 |
| COMPLEX.PDB | OG, E_SER_906  | OG, E_SER_958  | HG, E_SER_958   | 2.98 | 2.16 | 27.41 |
| COMPLEX.PDB | O, E_SER_890   | N, E_CYS_962   | H, E_CYS_962    | 2.88 | 1.90 | 12.44 |
| COMPLEX.PDB | O, E_ASP_887   | N, E_THR_964   | H, E_THR_964    | 2.98 | 1.99 | 9.13  |
| COMPLEX.PDB | O, E_SER_885   | N, E_GLN_966   | H, E_GLN_966    | 2.79 | 1.78 | 6.01  |
| COMPLEX.PDB | O, E_ALA_881   | N, E_PHE_970   | H, E_PHE_970    | 2.91 | 1.94 | 13.36 |
| COMPLEX.PDB | OD1, E_ASN_973 | OG1, E_THR_975 | HG1, E_THR_975  | 2.75 | 1.83 | 15.01 |
| COMPLEX.PDB | OE1, E_GLU_994 | OG, E_SER_977  | HG, E_SER_977   | 2.61 | 1.64 | 6.33  |
| COMPLEX.PDB | O, E_VAL_993   | N, E_PHE_978   | H, E_PHE_978    | 2.94 | 1.93 | 7.59  |
| COMPLEX.PDB | O, E_ARG_989   | N, E_LEU_982   | H, E_LEU_982    | 2.96 | 2.03 | 19.41 |
| COMPLEX.PDB | OD1, E_ASP_983 | OG, E_SER_988  | HG, E_SER_988   | 2.63 | 1.65 | 5.60  |
| COMPLEX.PDB | O, E_LEU_982   | N, E_ARG_989   | H, E_ARG_989    | 2.93 | 2.01 | 20.71 |
| COMPLEX.PDB | OD2, E_ASP_867 | NH2, E_ARG_989 | 2HH2, E_ARG_989 | 2.90 | 1.90 | 8.63  |
| COMPLEX.PDB | O, E_GLY_980   | N, E_PHE_991   | H, E_PHE_991    | 2.93 | 1.92 | 5.82  |
| COMPLEX.PDB | O, E_PHE_978   | N, E_VAL_993   | H, E_VAL_993    | 2.79 | 1.80 | 9.59  |
| COMPLEX.PDB | O, E_LYS_976   | N, E_LYS_995   | H, E_LYS_995    | 2.85 | 1.89 | 14.44 |
| COMPLEX.PDB | O, E_TYR_761   | OG1, E_THR_999 | HG1, E_THR_999  | 2.88 | 1.95 | 13.29 |

Table 3: The side chain and main chain hydrogen bonding networks within the structural model represented in COMPLEX.pdb. In this table, the residue naming scheme is **Chain ID\_residue name\_residue number**,  $\angle ADH$  represents the angle formed by acceptor (A), donor (D) and hydrogen (H) ( $\angle ADH$ ).

| PDB         | Acceptor (A)   | Donor (D)      | Hydrogen (H)    | D-A (Å) | H-A (Å) | $\angle ADH(^{\circ})$ |
|-------------|----------------|----------------|-----------------|---------|---------|------------------------|
| COMPLEX.PDB | OG, E.SER.29   | OG1, E.THR.32  | HG1, E.THR.32   | 2.72    | 1.76    | 6.24                   |
| COMPLEX.PDB | OE1, E.GLU.702 | OH, E.TYR.64   | HH, E.TYR.64    | 2.63    | 1.66    | 4.27                   |
| COMPLEX.PDB | OE2, E.GLU.103 | NZ, E.LYS.106  | 1HZ, E.LYS.106  | 2.94    | 1.96    | 12.59                  |
| COMPLEX.PDB | OD1, E.ASN.184 | NE2, E.HIS.111 | HE2, E.HIS.111  | 2.88    | 1.88    | 10.04                  |
| COMPLEX.PDB | OE2, E.GLU.115 | NE1, E.TRP.113 | HE1, E.TRP.113  | 2.99    | 2.09    | 21.85                  |
| COMPLEX.PDB | OD2, E.ASP.116 | OG, E.SER.119  | HG, E.SER.119   | 2.66    | 1.71    | 9.60                   |
| COMPLEX.PDB | OD1, E.ASP.234 | NZ, E.LYS.128  | 3HZ, E.LYS.128  | 2.94    | 1.95    | 10.09                  |
| COMPLEX.PDB | OD2, E.ASP.129 | NE, E.ARG.144  | HE, E.ARG.144   | 2.79    | 1.81    | 12.37                  |
| COMPLEX.PDB | OD2, E.ASP.234 | NE2, E.HIS.167 | HE2, E.HIS.167  | 2.83    | 1.86    | 15.02                  |
| COMPLEX.PDB | OE2, E.GLU.182 | NE1, E.TRP.185 | HE1, E.TRP.185  | 2.92    | 1.92    | 8.41                   |
| COMPLEX.PDB | OE1, E.GLN.206 | ND2, E.ASN.196 | 2HD2, E.ASN.196 | 2.92    | 1.94    | 11.76                  |
| COMPLEX.PDB | OD1, E.ASP.200 | OG1, E.THR.202 | HG1, E.THR.202  | 2.72    | 1.76    | 6.38                   |
| COMPLEX.PDB | OE1, E.GLU.182 | OG, E.SER.210  | HG, E.SER.210   | 2.66    | 1.69    | 4.87                   |
| COMPLEX.PDB | OD1, E.ASP.190 | NE, E.ARG.216  | HE, E.ARG.216   | 2.91    | 2.02    | 23.66                  |
| COMPLEX.PDB | OD2, E.ASP.190 | NH2, E.ARG.216 | 1HH2, E.ARG.216 | 3.00    | 2.07    | 19.79                  |
| COMPLEX.PDB | OD1, E.ASP.130 | OG1, E.THR.229 | HG1, E.THR.229  | 2.76    | 1.81    | 9.95                   |
| COMPLEX.PDB | OD2, E.ASP.225 | NZ, E.LYS.232  | 2HZ, E.LYS.232  | 2.92    | 1.96    | 15.31                  |
| COMPLEX.PDB | OE1, E.GLU.278 | NH1, E.ARG.240 | 2HH1, E.ARG.240 | 2.96    | 2.06    | 22.46                  |
| COMPLEX.PDB | OE1, E.GLU.278 | NH2, E.ARG.240 | 2HH2, E.ARG.240 | 2.88    | 1.94    | 17.95                  |
| COMPLEX.PDB | OE1, E.GLN.445 | NE2, E.GLN.246 | 2HE2, E.GLN.246 | 2.93    | 1.98    | 15.85                  |
| COMPLEX.PDB | OD1, E.ASP.287 | NZ, E.LYS.252  | 3HZ, E.LYS.252  | 2.98    | 1.98    | 8.55                   |
| COMPLEX.PDB | OD1, E.ASP.259 | OG, E.SER.261  | HG, E.SER.261   | 2.70    | 1.76    | 11.26                  |
| COMPLEX.PDB | OD2, E.ASP.363 | OG, E.SER.263  | HG, E.SER.263   | 2.97    | 2.07    | 18.12                  |
| COMPLEX.PDB | OE1, E.GLN.424 | OG1, E.THR.282 | HG1, E.THR.282  | 2.98    | 2.03    | 7.37                   |
| COMPLEX.PDB | OD2, E.ASP.287 | OG, E.SER.284  | HG, E.SER.284   | 2.69    | 1.72    | 5.06                   |
| COMPLEX.PDB | OE2, E.GLU.281 | NZ, E.LYS.319  | 1HZ, E.LYS.319  | 2.86    | 2.03    | 29.01                  |
| COMPLEX.PDB | OE1, E.GLU.371 | NZ, E.LYS.334  | 3HZ, E.LYS.334  | 2.94    | 1.96    | 13.07                  |
| COMPLEX.PDB | OD2, E.ASP.253 | NH2, E.ARG.351 | 1HH2, E.ARG.351 | 2.98    | 2.07    | 20.97                  |
| COMPLEX.PDB | OH, E.TYR.347  | NZ, E.LYS.356  | 1HZ, E.LYS.356  | 2.92    | 1.95    | 13.13                  |
| COMPLEX.PDB | OH, E.TYR.333  | OG1, E.THR.362 | HG1, E.THR.362  | 2.73    | 1.83    | 17.19                  |
| COMPLEX.PDB | OE2, E.GLU.412 | NH1, E.ARG.396 | 1HH1, E.ARG.396 | 2.89    | 1.91    | 11.57                  |
| COMPLEX.PDB | OE2, E.GLU.412 | OH, E.TYR.410  | HH, E.TYR.410   | 2.72    | 1.77    | 11.16                  |
| COMPLEX.PDB | OG1, E.THR.461 | OH, E.TYR.450  | HH, E.TYR.450   | 2.76    | 1.91    | 23.68                  |
| COMPLEX.PDB | OD1, E.ASP.491 | OG1, E.THR.461 | HG1, E.THR.461  | 2.75    | 1.78    | 5.29                   |
| COMPLEX.PDB | OD1, E.ASN.475 | ND2, E.ASN.478 | 1HD2, E.ASN.478 | 2.92    | 1.93    | 8.35                   |
| COMPLEX.PDB | OD2, E.ASP.496 | OG, E.SER.493  | HG, E.SER.493   | 2.79    | 1.85    | 10.99                  |
| COMPLEX.PDB | OE2, E.GLU.748 | NH2, E.ARG.503 | 2HH2, E.ARG.503 | 2.87    | 1.91    | 15.22                  |
| COMPLEX.PDB | OH, E.TYR.607  | ND2, E.ASN.509 | 2HD2, E.ASN.509 | 2.97    | 2.01    | 14.80                  |
| COMPLEX.PDB | OE2, E.GLU.546 | OH, E.TYR.511  | HH, E.TYR.511   | 2.64    | 1.68    | 7.93                   |
| COMPLEX.PDB | OD1, E.ASP.286 | ND2, E.ASN.518 | 1HD2, E.ASN.518 | 2.98    | 2.02    | 15.09                  |
| COMPLEX.PDB | OD1, E.ASP.285 | OH, E.TYR.520  | HH, E.TYR.520   | 2.61    | 1.65    | 7.75                   |
| COMPLEX.PDB | OE2, E.GLU.546 | NE2, E.HIS.524 | HE2, E.HIS.524  | 2.89    | 1.87    | 3.11                   |
| COMPLEX.PDB | OE1, E.GLU.546 | NZ, E.LYS.552  | 1HZ, E.LYS.552  | 2.88    | 1.92    | 14.82                  |
| COMPLEX.PDB | OD2, E.ASP.541 | NE, E.ARG.556  | HE, E.ARG.556   | 2.92    | 1.95    | 14.11                  |
| COMPLEX.PDB | OD1, E.ASN.557 | NH1, E.ARG.556 | 1HH1, E.ARG.556 | 2.90    | 2.00    | 22.19                  |
| COMPLEX.PDB | OD1, E.ASP.541 | NH2, E.ARG.556 | 1HH2, E.ARG.556 | 2.85    | 1.84    | 6.22                   |
| COMPLEX.PDB | OE1, E.GLU.554 | NZ, E.LYS.567  | 1HZ, E.LYS.567  | 2.96    | 2.06    | 21.68                  |
| COMPLEX.PDB | OE1, E.GLN.966 | NZ, E.LYS.574  | 2HZ, E.LYS.574  | 2.91    | 1.94    | 13.40                  |
| COMPLEX.PDB | OD2, E.ASP.577 | NE, E.ARG.579  | HE, E.ARG.579   | 2.81    | 1.80    | 5.72                   |
| COMPLEX.PDB | OD2, E.ASP.842 | OH, E.TYR.580  | HH, E.TYR.580   | 2.73    | 1.77    | 8.61                   |
| COMPLEX.PDB | OD1, E.ASP.757 | NH1, E.ARG.586 | 2HH1, E.ARG.586 | 2.99    | 2.09    | 22.44                  |
| COMPLEX.PDB | OD1, E.ASP.757 | NH2, E.ARG.586 | 2HH2, E.ARG.586 | 2.88    | 1.93    | 16.41                  |
| COMPLEX.PDB | OG1, E.THR.568 | OG1, E.THR.587 | HG1, E.THR.587  | 2.95    | 1.99    | 3.79                   |
| COMPLEX.PDB | OG, E.SER.564  | OG1, E.THR.591 | HG1, E.THR.591  | 2.79    | 1.86    | 13.03                  |
| COMPLEX.PDB | OE1, E.GLU.71  | OH, E.TYR.611  | HH, E.TYR.611   | 2.82    | 1.92    | 18.25                  |
| COMPLEX.PDB | OD1, E.ASP.66  | NZ, E.LYS.615  | 1HZ, E.LYS.615  | 2.90    | 1.91    | 9.67                   |
| COMPLEX.PDB | OE1, E.GLU.618 | NZ, E.LYS.626  | 2HZ, E.LYS.626  | 2.87    | 1.92    | 16.82                  |

|             |                |                |                 |      |      |       |
|-------------|----------------|----------------|-----------------|------|------|-------|
| COMPLEX.PDB | OE2, E_GLU_634 | NZ, E_LYS_627  | 2HZ, E_LYS_627  | 2.91 | 2.07 | 28.11 |
| COMPLEX.PDB | OE2, E_GLU_643 | NZ, E_LYS_631  | 2HZ, E_LYS_631  | 2.89 | 1.90 | 10.46 |
| COMPLEX.PDB | OE2, E_GLU_738 | OH, E_TYR_646  | HH, E_TYR_646   | 2.79 | 1.86 | 12.86 |
| COMPLEX.PDB | OD1, E_ASP_696 | OG1, E_THR_724 | HG1, E_THR_724  | 2.95 | 2.05 | 18.78 |
| COMPLEX.PDB | OD1, E_ASP_725 | OH, E_TYR_747  | HH, E_TYR_747   | 2.67 | 1.74 | 12.91 |
| COMPLEX.PDB | OD2, E_ASP_582 | NE, E_ARG_754  | HE, E_ARG_754   | 2.90 | 1.89 | 4.50  |
| COMPLEX.PDB | OD1, E_ASP_843 | NH1, E_ARG_754 | 2HH1, E_ARG_754 | 2.92 | 2.03 | 23.47 |
| COMPLEX.PDB | OD1, E_ASP_582 | NH2, E_ARG_754 | 1HH2, E_ARG_754 | 2.83 | 1.94 | 23.45 |
| COMPLEX.PDB | OD2, E_ASP_843 | NH2, E_ARG_754 | 2HH2, E_ARG_754 | 2.89 | 1.95 | 18.36 |
| COMPLEX.PDB | OD1, E_ASP_582 | ND2, E_ASN_758 | 1HD2, E_ASN_758 | 2.94 | 1.96 | 11.82 |
| COMPLEX.PDB | OG, E_SER_755  | OG, E_SER_783  | HG, E_SER_783   | 2.82 | 1.99 | 26.18 |
| COMPLEX.PDB | OE2, E_GLU_787 | OH, E_TYR_789  | HH, E_TYR_789   | 2.88 | 2.00 | 19.65 |
| COMPLEX.PDB | OG, E_SER_778  | NZ, E_LYS_803  | 3HZ, E_LYS_803  | 2.98 | 2.03 | 15.64 |
| COMPLEX.PDB | OD2, E_ASP_805 | OG, E_SER_808  | HG, E_SER_808   | 2.69 | 1.73 | 8.01  |
| COMPLEX.PDB | OD1, E_ASP_853 | NE, E_ARG_831  | HE, E_ARG_831   | 2.89 | 2.00 | 23.79 |
| COMPLEX.PDB | OD1, E_ASP_837 | ND2, E_ASN_851 | 2HD2, E_ASN_851 | 2.91 | 1.91 | 8.10  |
| COMPLEX.PDB | OD1, E_ASP_837 | ND1, E_HIS_852 | HD1, E_HIS_852  | 2.87 | 1.91 | 17.61 |
| COMPLEX.PDB | OE1, E_GLU_865 | NE, E_ARG_861  | HE, E_ARG_861   | 2.98 | 2.01 | 12.72 |
| COMPLEX.PDB | OG1, E_THR_964 | OG, E_SER_890  | HG, E_SER_890   | 2.71 | 1.79 | 15.36 |
| COMPLEX.PDB | OG, E_SER_906  | OG, E_SER_958  | HG, E_SER_958   | 2.98 | 2.16 | 27.41 |
| COMPLEX.PDB | OD1, E_ASN_973 | OG1, E_THR_975 | HG1, E_THR_975  | 2.75 | 1.83 | 15.01 |
| COMPLEX.PDB | OE1, E_GLU_994 | OG, E_SER_977  | HG, E_SER_977   | 2.61 | 1.64 | 6.33  |
| COMPLEX.PDB | OD1, E_ASP_983 | OG, E_SER_988  | HG, E_SER_988   | 2.63 | 1.65 | 5.60  |
| COMPLEX.PDB | OD2, E_ASP_867 | NH2, E_ARG_989 | 2HH2, E_ARG_989 | 2.90 | 1.90 | 8.63  |

Table 4: The side chain hydrogen bonding networks within the structural model represented in COMPLEX.pdb. In this table, the residue naming scheme is **Chain ID\_residue name\_residue number**,  $\angle ADH$  represents the angle formed by acceptor (A), donor (D) and hydrogen (H) ( $\angle ADH$ ).
